# Supplementary material
Source: Elsevier journal article supplement (https://www.sciencedirect.com/science/article/pii/S1579212917303762)
Supplement: mmc1 [file S1579212917303762:mmc1.pdf]

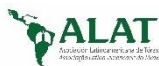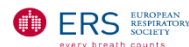

# **HOJA DE RUTA PARA LA ELIMINACIÓN DE LA TUBERCULOSIS EN LATINOAMÉRICA Y EL CARIBE**

**Asociación Latinoamericana de Tórax – ALAT  
Sociedad Europea de Enfermedades Respiratorias – ERS  
con colaboración de la Organización Panamericana de la Salud**

**Proyecto ALAT/ERS LATSINTB (Latinoamérica sin tuberculosis)  
Departamento de Tuberculosis de ALAT**

**Junio de 2017**

**Autores:** Carlos A. Torres-Duque, Zhenia M. Fuentes Alcalá, Adrián Rendón, Domingo Palmero, Carlos E. Awad García, Miguel Ángel Salazar Lezama, Margareth Dalcolmo, Lia D'Ambrosio, Raquel Duarte, Giovanni Battista Migliori.

Carlos A. Torres-Duque (*Fundación Neumológica Colombiana. Universidad de La Sabana. Bogotá, Colombia*), Zhenia M. Fuentes Alcalá (*Hospital José Ignacio Baldó. Caracas, Venezuela*), Adrián Rendón (*Hospital Universitario de Monterrey. Monterrey, México*), Domingo Palmero (*Hospital de Enfermedades Infecciosas Francisco Javier Muñiz. Universidad de Buenos Aires. Buenos Aires, Argentina*), Carlos E. Awad García (*Hospital Santa Clara. Bogotá, Colombia*), Miguel Ángel Salazar (*Instituto Nacional de Enfermedades Respiratorias Ismael Cosío Villegas. México D.F., México*), Margareth Dalcolmo (*Centro de Referencia Helio Fraga, FIOCRUZ, Ministerio de Salud, Rio de Janeiro, Brasil*), Lía D'Ambrosio (*World Health Organization Collaborating Centre for Tuberculosis and Lung Diseases, Maugeri Care and Research Institute. Tradate, Italia*), Raquel Duarte (*Universidad de Porto. Porto, Portugal*), Giovanni Battista Migliori (*World Health Organization Collaborating Centre for Tuberculosis and Lung Diseases, Maugeri Care and Research Institute. Tradate, Italia*)

**Colaboradores:** Asistentes a la VII reunión de países de baja incidencia en Las Américas, Santiago de Chile, julio 3 y 4 de 2016, convocada por la Organización Panamericana de la Salud [OPS], con la participación de la Asociación Latinoamericana de Tórax (ALAT) y la Sociedad Europea de Enfermedades Respiratorias [ERS]: Chris Archibald (Canadá), Fabiola Arias (Chile), Sandra Ariza (Colombia), Carlos E. Awad García (Colombia), Cecilia Coitinho (Uruguay), Mariela Contreras (Uruguay), José Raúl de Armas (Cuba), Roberto Del Águila (Chile), Mirtha Del Granado (EEUU), Alvaro Díaz (Chile), Raúl Díaz (Cuba), Raquel Duarte (Portugal), Zhenia M. Fuentes Alcalá (Venezuela), Marcos Gallardo (Chile), Martha Angelica García (México), Edilberto González (Cuba), Getahun Gebre Haileyesus (Suiza), Tania Herrera (Chile), Karla Kohan (Chile), Paula Lasserra (Uruguay), Rosario Lepe (Chile), Zeidy Mata (Costa Rica), Giovanni Battista Migliori (Italia), Adriana Montoya (Colombia), Ernesto Moreno (Colombia), Marcela Moreno (Chile), Adrián Rendón (México), Jorge Rodríguez De Marco (Uruguay), Gonzalo Solis (Chile), Zulema Torres (Chile), Carlos A. Torres-Duque (Colombia), Jorge Victoria (Panamá), Marcelo Vila (Argentina), Alvaro Yañez del Villar (Chile).

**Comités Ejecutivos ALAT: 2014-2016:** Alejandro Casas, Andrés Palomar, Mark Cohen, Luis Fernando Giraldo, María Montes de Oca; **2016 - 2018:** Andrés Palomar, Gustavo Zabert, Juan Carlos Vásquez, Jorge Salas, Alejandro Casas.

**Agradecimientos:** Los autores y las instituciones representadas expresan su agradecimiento especial a los doctores Mirtha Del Granado y Jorge Victoria de la Organización Panamericana de la Salud por su especial colaboración.

**Aclaración:** La *Hoja de Ruta para la Eliminación de la Tuberculosis en Latinoamérica y el Caribe* es un documento oficial del Departamento de Tuberculosis de la Asociación Latinoamericana de Tórax (ALAT) con el respaldo de la Sociedad Europea de Enfermedades Respiratorias (ERS) y hace parte del Proyecto LATSINTB (Latinoamérica sin Tuberculosis) de ALAT/ERS. Este documento no representa una posición oficial de la Organización Panamericana de la Salud [OPS].

**Citación:** Torres-Duque CA, Fuentes Z, Rendón A, Palmero D, Awad CE, Salazar-Lezama MA, Dalcolmo M, D'Ambrosio L, Duarte R, Migliori GB. Hoja de Ruta para la Eliminación de la Tuberculosis en Latinoamérica y el Caribe. Proyecto LATSINTB, Asociación Latinoamericana de Tórax (ALAT)/European Respiratory Society (ERS). Arch Bronconeumol. 2017; <http://dx.doi.org/j.arbres.2017.07.004>.

# **Hoja de Ruta para la Eliminación de la Tuberculosis en Latinoamérica y el Caribe**

## **Contenido**

### **Resumen**

1. Introducción.
2. Métodos y definiciones.
3. Panorama de la situación de la tuberculosis en Latinoamérica y el Caribe.
4. Marcos de referencia para la elaboración de la Hoja de Ruta.
5. Áreas de acción prioritaria para la eliminación de la tuberculosis en Latinoamérica y el Caribe.
6. Indicadores de monitoreo y evaluación.
7. Roles y responsabilidades.
8. Papel de la comunidad académica

### **Bibliografía**

## Hoja de Ruta para la Eliminación de la Tuberculosis en Latinoamérica y el Caribe

### Resumen

La Región de las Américas fue la primera en el mundo en cumplir las metas definidas por los *Objetivos de Desarrollo del Milenio relacionadas con la tuberculosis* para el año 2015 de detener o disminuir en un 50% la mortalidad y la prevalencia de la TB en comparación con 1990.

La incidencia de tuberculosis notificada en la subregión de Latinoamérica y el Caribe en 2015 fue de 32,8 por 100.000 habitantes y la estimada de 40,5, que se encuentra por encima de la media de la Región de las Américas, estimada en 27,1 por 100.000, y por debajo de la media mundial, estimada en 141,9 por 100.000 para el mismo año. La heterogeneidad es una característica sobresaliente del comportamiento de la tuberculosis en esta subregión, en la cual pocos países cumplen el criterio de baja incidencia (<10 casos/100.000 habitantes): Bahamas, Costa Rica, Cuba, Jamaica, Puerto Rico y algunos países y territorios del Caribe.

La Organización Mundial de la Salud (OMS) lanzó recientemente la Estrategia Mundial y las metas para la prevención, atención y control de la tuberculosis después del 2015 (Estrategia Fin de la Tuberculosis) y el Marco de Acción para la Eliminación de la Tuberculosis en países de baja incidencia. Por su parte, la Región de las Américas cuenta con el **Plan Estratégico 2014–2019** y el **Plan de Acción para la Prevención y el Control de la Tuberculosis 2016-2019** de la Organización Panamericana de Salud (OPS) que acogen los lineamientos de los marcos globales de la OMS, pero no se enfocan específicamente en las acciones para la eliminación de la tuberculosis. Los países y territorios de Latinoamérica y El Caribe de baja incidencia, previamente mencionados, no son los únicos que se encuentran en condiciones de abordar las acciones propias de países en vía de eliminación de la tuberculosis; debido a la gran variación territorial de la situación de la enfermedad, en países de incidencia media existen zonas geográficas de baja incidencia y condiciones generales que les permitiría abordar acciones de eliminación en los niveles sub-nacionales.

Considerando que el **Marco de Acción para la Eliminación de la Tuberculosis en países de baja incidencia** de la OMS aplica apropiadamente a Canadá y Estados Unidos, pero requiere una adaptación para el resto de la región de las Américas, la Asociación Latinoamericana de Tórax (ALAT), con el respaldo de la Sociedad Europea de Enfermedades Respiratorias (ERS), y la colaboración de algunos funcionarios de la OPS, ha elaborado la presente **Hoja de Ruta para la Eliminación de la Tuberculosis en Latinoamérica y el Caribe**.

## 1. Introducción

La Región de las Américas, que incluye Norteamérica (Canadá y Estados Unidos), Latinoamérica y el Caribe, fue la primera en cumplir las metas definidas por los *Objetivos de Desarrollo del Milenio (ODM) relacionadas a la tuberculosis (TB)* (1) para el año 2015 de detener o disminuir en un 50% la mortalidad y la incidencia de la TB en comparación con 1990. Según estimaciones de la Organización Mundial de la Salud (OMS), la incidencia de TB en la Región se redujo de 55,3 por 100.000 habitantes en 1990 a 27,1 por 100.000 habitantes en 2015, correspondiente a un 51% de reducción (2, 3).

En la subregión de Latinoamérica y el Caribe la incidencia estimada de TB fue de 40,5 y la notificada de 32,8 casos por 100.000 habitantes en 2015 (3); estas cifras se encuentran por encima de la notificada para toda la Región de las Américas de 27,1 casos por 100.000 habitantes y por debajo de la media mundial, estimada en 141,9 por 100.000 para ese mismo año (2). A pesar de estos logros, en 2015 hubo 256.692 casos nuevos y 24.900 defunciones por TB en las Américas (2).

La heterogeneidad es una característica sobresaliente del comportamiento de la TB en esta subregión (4), en la cual pocos países cumplen el criterio de baja incidencia (<10 casos/100.000 habitantes): Costa Rica, Cuba, Jamaica, Puerto Rico y algunos países y territorios del Caribe (Anguila, Antigua y Barbuda, Aruba, Barbados, Bermuda, Bonaire San Eustaquio y Saba, Islas Vírgenes Británicas, Islas Caimán, Curazao, Dominica, Granada, Montserrat, Saint Kitts y Nevis, Santa Lucía, San Vicente y las Granadinas, San Maarten (sector holandés), Islas Turcas y Caicos y las Islas Vírgenes), que se suman a Estados Unidos y Canadá para completar el panorama de países de baja incidencia en las Américas. Cuatro países (Brasil, Perú, México y Haití) aportan más del 50% de la carga regional y cerca del 60% de los casos de TB asociados a virus de la inmunodeficiencia humana (VIH) (2, 4, 5). Brasil, por su gran población y con una incidencia estimada en 2015 de 41/100.000, es uno de los 22 países (posición 19) que aportan mayor carga de enfermedad por TB en el mundo (2).

La OMS lanzó recientemente la Estrategia Mundial y las metas para la prevención, atención y control de la tuberculosis después del 2015 (6), llamada **Estrategia Fin de la Tuberculosis**, y el **Marco de Acción para la Eliminación de la Tuberculosis en países de baja incidencia** (7). La implementación de la estrategia Fin de la TB, el Marco para la Eliminación de la TB y las acciones derivadas representan un reto para las Américas, particularmente para Latinoamérica y el Caribe por su mencionada heterogeneidad.

Por razones operativas y de utilización priorizada de recursos, no se recomienda la implementación indiscriminada de acciones encaminadas a la eliminación de la TB en todos los países y regiones del mundo sino en aquéllos de baja incidencia (7, 8). Estos

países se caracterizan por una baja tasa de transmisión en la población general, brotes epidémicos ocasionales, concentración de la TB en poblaciones vulnerables y de mayor edad y alto impacto de las migraciones desde zonas de mayor incidencia (7). Las acciones prioritarias para la eliminación están determinadas por este panorama epidemiológico (8).

La Organización Panamericana de la Salud (OPS) cuenta con el **Plan Estratégico 2014 – 2019** (9) y el **Plan de Acción para la Prevención y el Control de la Tuberculosis 2016-2019** (4) que tienen como objetivo principal la reducción de la mortalidad y la morbilidad por TB pero justificadamente no se enfocan en la TB como una de las enfermedades prioritarias para abordar su eliminación a 2019. El Plan de Acción acoge los lineamientos de la Estrategia Mundial Fin de la Tuberculosis post-2015 (6).

Los países y territorios de Latinoamérica y el Caribe que cumplen el criterio de baja incidencia, o están cercanos a cumplirlo, se encuentran en condiciones de abordar las acciones propias de los países en vía de eliminación (7). Adicionalmente, debido a la gran variación territorial de la situación de la enfermedad, en países de incidencia media existen zonas geográficas de baja incidencia y condiciones generales que les permitiría abordar también acciones de eliminación en los niveles sub-nacionales.

Desde la década pasada, los países de baja incidencia de la Región de las Américas han venido desarrollando reuniones y definiendo objetivos, acciones prioritarias y compromisos. Tomando como referencia el **Marco de Acción para la Eliminación de la Tuberculosis en países de baja incidencia de la OMS** desarrollado en 2015 (7), que utiliza principalmente la experiencia en Europa (10), y aceptando que éste aplica apropiadamente a Canadá y Estados Unidos pero requiere adaptación para el resto de la Región, la Asociación Latinoamericana de Tórax (ALAT) y la Sociedad Europea de Enfermedades Respiratorias (ERS) han desarrollado esta **Hoja de Ruta para la Eliminación de la Tuberculosis en Latinoamérica y el Caribe** que fue discutida en la VIII Reunión de países de baja incidencia de tuberculosis de las Américas convocada por la OPS y realizada en julio de 2016. Un resumen de este documento se publicó en inglés recientemente (11).

## 2. Métodos y definiciones

Para efectos de este documento, se definen como de **baja incidencia** aquellos países con una tasa de casos notificados de TB  $< 10/100.000$  habitantes por año (12). **Pre-eliminación** se define como  $< 1$  caso de TB notificado (todas las formas) por 100.000 habitantes por año. **Eliminación de TB como problema de salud pública** se define como  $< 1$  caso de TB notificado (todas las formas) por millón de habitantes por año (algunos autores han propuesto que sea  $< 1$  caso de TB con baciloscopia positiva por millón de habitantes para enfocarse en el concepto de transmisión de infección e impacto sobre la salud pública) (13). Para estas definiciones se prefiere usar los casos notificados y no los estimados bajo el concepto de que en los países de baja incidencia o en pre-eliminación la brecha entre estimación y notificación es pequeña (7, 14).

Los documentos de referencia principales utilizados para la elaboración de la **Hoja de Ruta para la Eliminación de la Tuberculosis en Latinoamérica y el Caribe** fueron: la Estrategia Mundial post-2015 Fin de la TB (6), el Marco de Acción para la Eliminación de la Tuberculosis en países de baja incidencia (7) y el Plan de Acción para la Prevención y el Control de la Tuberculosis 2016-2019 (4). Adicionalmente, los documentos de memoria de las reuniones de los países de baja incidencia en la Región de las Américas (15, 16).

En su interés por acercar la comunidad científica a los responsables directos de los programas nacionales de Tuberculosis, la ALAT realizó una reunión conjunta con la OPS, con el respaldo de la ERS, en abril de 2015 en la ciudad de Bogotá, en la cual se encontró pertinente realizar una **Hoja de Ruta para la Eliminación de la Tuberculosis en Latinoamérica y el Caribe**. El documento preliminar se discutió en la VIII Reunión de países de baja incidencia de tuberculosis de las Américas realizada en Santiago de Chile en julio de 2016; un resumen fue publicado en inglés recientemente (11).

### 3. Panorama de la situación epidemiológica de la tuberculosis en Latinoamérica y el Caribe y sus tendencias

Aunque, como se mencionó, las Américas fue la primera región del mundo en cumplir las metas de los ODM relacionadas a la TB (1), esta enfermedad continúa representando un importante desafío para la salud pública, especialmente para la subregión de Latinoamérica y el Caribe (4), donde la situación es heterogénea con países que aún no han logrado dichas metas, en tanto que otros avanzan hacia la eliminación de la enfermedad.

De acuerdo con la OMS, para el 2015 se estimaron 268.492 casos y 24.337 defunciones por TB en las Américas, representando una tasa de incidencia y de mortalidad de 27,1 y 2,5 por 100.000 habitantes, respectivamente (2). Cerca del 60% de la incidencia está concentrada en cuatro países: Brasil, Perú, México y Haití. La proporción de la asociación TB/VIH fue de 11,8% y se efectuó serología para VIH en el 81,8% del total de casos de TB notificados. En el mismo año 2015 se estimaron 7.700 casos de TB multidrogorresistente (TB-MDR) de los cuales solo 58,5% (4.508) se notificaron (2). Pocos países han logrado que la proporción de casos de TB asociados a VIH/Sida que tienen tratamiento antirretroviral sea superior al 90%.

Aunque persiste una brecha entre la incidencia estimada y la detección, se ha alcanzado la meta definida por los ODM (1) de 75% de detección (excepto en las islas del Caribe). Todos los países, excepto dos, cumplen también la meta de disminuir la mortalidad en un 50% para el año 2015 respecto al año 1990, mientras que, en 2013, el objetivo de alcanzar un éxito de tratamiento en más del 85% de los casos (casos curados más casos con tratamiento terminado sin criterio de curación) no fue alcanzado por ocho países.



En los últimos años se ha presentado una notoria desaceleración de la tasa de declinación anual de la incidencia que traía la Región (Figura 1) (5). Pocos países y territorios en América cumplen el criterio de baja incidencia (tasa de incidencia es  $<10/100.000$ ): Canadá, Costa Rica, Cuba, Estados Unidos, Jamaica, Puerto Rico y varios de los países y territorios del Caribe inglés. Cuba revirtió su situación desfavorable en la década de los 90 (17) y tiene más de un década como país de baja incidencia. Es necesario destacar que los países y territorios de Latinoamérica y Caribe que han alcanzado esa meta representan menos del 5% de los habitantes de América.

Existe una baja detección de casos de TB-MDR (58,5% de los estimados en 2015) (2). La mayor parte de los casos detectados (95%) está en tratamiento según normas OPS/OMS. La proporción de casos que tienen un tratamiento exitoso (Figura 2) oscila, desde 2006, entre 38 y 59% (57% en las cohortes 2012) (5, 18).

Se ha definido que en Latinoamérica y el Caribe, los países con menor gasto en salud per cápita, menor accesibilidad a los servicios de salud, menor expectativa de vida al nacimiento y menor tasa de detección de TB, tienen mayores tasas de incidencia de la enfermedad (19).

*Logros del Plan Regional de TB 2006-2015:* El Plan Regional 2006 – 2015 (20) incorporó los componentes de la estrategia Alto a la TB (21). Hubo un aumento gradual de los recursos financieros, especialmente de los gobiernos, destinados a la prevención y el control de la TB, bajo el enfoque del manejo programático, contando con asistencia técnica de la OPS/OMS y con monitoreo y evaluación periódica del cumplimiento de los objetivos, metas e indicadores de mayor relevancia.

En Latinoamérica y el Caribe se logró un aumento de la detección de casos nuevos y de la cobertura de la baciloscopia y el cultivo de *M. tuberculosis*, y se introdujo la evaluación de la calidad de los métodos diagnósticos implementados; aumentó el número de afectados por TB en quienes se conoció su estado de infección por VIH y el número de coinfectados TB/VIH que iniciaron TAR y TPC; se inició y se expandió en los ámbitos nacionales el manejo clínico programático de la TB-MDR; se promocionó la participación activa de la sociedad civil y de socios técnicos y financieros, públicos y privados en la prevención y el control de la TB.

*Brechas persistentes.* Se mantiene una brecha entre los casos estimados y los notificados (casos no detectados o no notificados); la accesibilidad al diagnóstico bacteriológico y, particularmente, al diagnóstico molecular y las pruebas de susceptibilidad a fármacos antituberculosis sigue siendo deficiente frente a las metas en ciertos países y territorios dificultando el diagnóstico oportuno y tratamiento apropiado de la TB y de la TB resistente a fármacos (TB-MDR, TB-XDR) y la asociada a comorbilidades como el VIH y la DM; el abordaje interprogramático e intersectorial necesario para la identificación y manejo integral y eficiente de los factores de riesgo y los determinantes sociales de la TB como el VIH, la DM, alcoholismo, tabaquismo, la adicción a drogas ilícitas, la indigencia y el hacinamiento, entre otros, es limitado y



requiere ser fortalecido; el reconocimiento de poblaciones vulnerables como personas privadas de libertad, indígenas, afrodescendientes, migrantes y poblaciones pobres de grandes ciudades y el enfoque diferencial necesario para enfrentar su problemática de TB son acciones cuyo alcance sigue siendo insuficiente y requieren compromiso político, manejo intersectorial y estrategias específicas dentro de las cuales se destaca la protección social con participación activa de la sociedad civil y de las comunidades (15, 16).

El menor gasto en salud per cápita, la menor accesibilidad a los servicios de salud, la menor expectativa de vida al nacimiento y la menor tasa de detección de TB se relacionan con mayores tasas de incidencia de la enfermedad (19).

En resumen, la situación epidemiológica en Latinoamérica y el Caribe y su tendencia nos indica que: 1) existe una desaceleración en el descenso de la incidencia estimada; 2) aunque se han cumplido las metas definidas por los ODM, persiste una brecha entre casos notificados y estimados; 3) la coinfección TB/VIH persiste como un grave problema en el control de la TB; 4) la TB-MDR, sigue representando una grave amenaza; 5) aunque no existe una cuantificación precisa, la participación de la comunidad y de los sectores diferentes de la salud en las actividades de control de la TB es limitada.

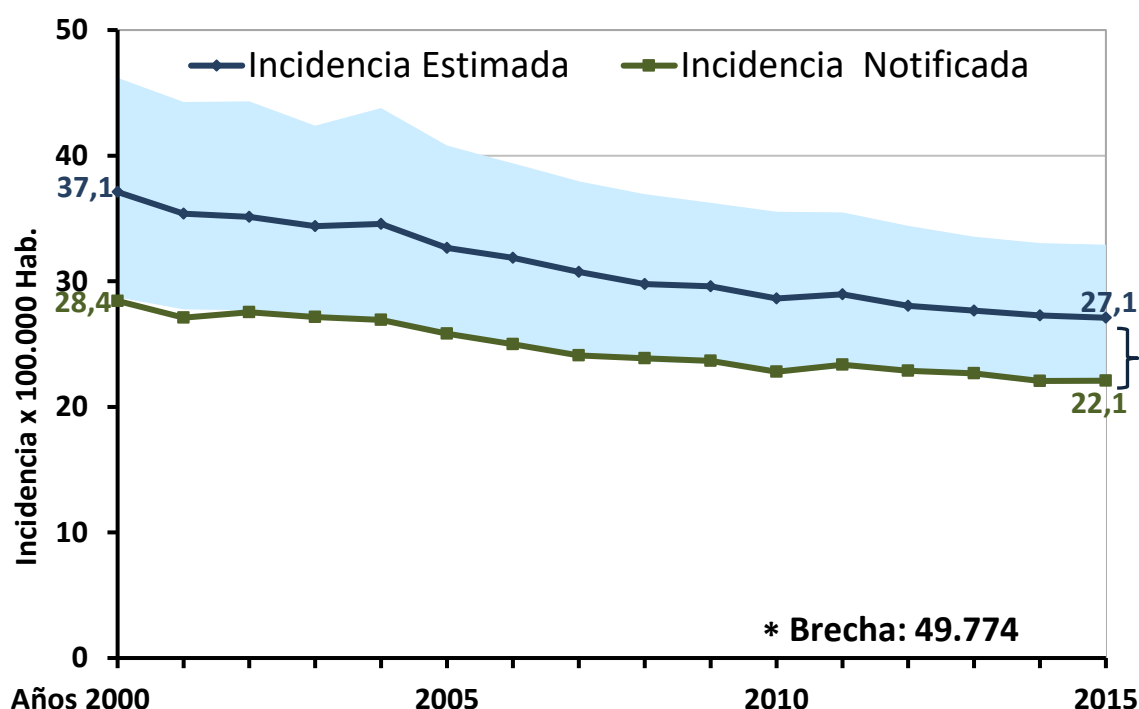

**Figura 1. Incidencia de TB todas las formas. América, 1990-2015 (5)**  
(el área sombreada representa el nivel de incertidumbre). Modificada de la referencia 5.

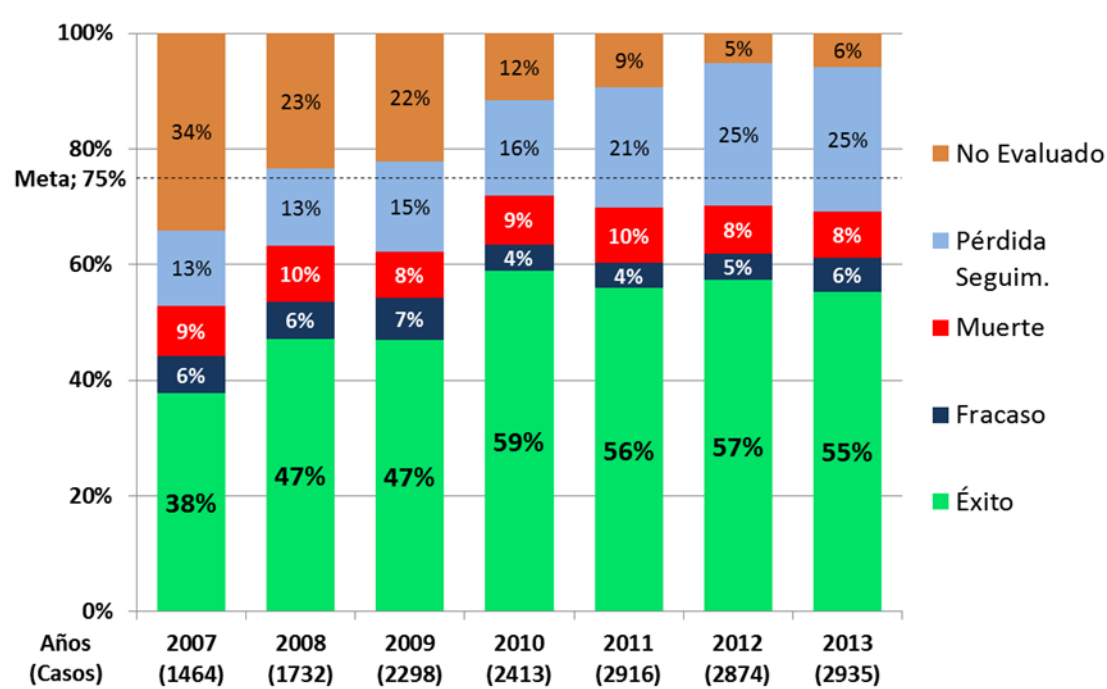

Figura 2. Evaluación de las cohortes de TB-MDR (5, 18)

4. Marcos de referencia para la elaboración de la Hoja de Ruta

4.1. Estrategia Mundial y metas para la prevención, atención y control de la tuberculosis después del 2015 (Estrategia Fin de la Tuberculosis)

La OMS lanzó la Estrategia Mundial y las metas para la prevención, atención y control de la Tuberculosis después del 2015, llamada **Estrategia Fin de la Tuberculosis** (6) (Tabla 1). La implementación de esta estrategia deberá adaptarse a la incidencia de la TB y las condiciones de cada región y país.

Tabla 1. Visión, metas e indicadores de la Estrategia Fin de la Tuberculosis (6)

|                                                                      |                                    |      |       |
|----------------------------------------------------------------------|------------------------------------|------|-------|
| VISIÓN                                                               | Un mundo libre de tuberculosis     |      |       |
| META                                                                 | Fin de la epidemia de tuberculosis |      |       |
| INDICADORES                                                          | HITOS                              |      | METAS |
|                                                                      | 2020                               | 2025 | 2035  |
| Reducción de la mortalidad por TB en comparación con 2015 (%)        | 35%                                | 75%  | 95%   |
| Reducción de la tasa de incidencia de TB en comparación con 2015 (%) | 20%                                | 50%  | 90%   |
| Familias enfrentadas a costos catastróficos por TB (%)               | 0                                  | 0    | 0     |

## *Pilares y componentes*

### **1. Atención y prevención integrada centrada en el paciente**

- A. Diagnóstico precoz de la TB con acceso universal a pruebas de sensibilidad y cribado sistemático de los contactos y los grupos de alto riesgo.
- B. Tratamiento de todas las personas con TB, incluida la TB resistente a drogas, con soporte centrado en el paciente.
- C. Actividades de colaboración TB/VIH y manejo de las comorbilidades.
- D. Tratamiento preventivo de las personas de alto riesgo y vacunación contra la TB.

### **2. Políticas Audaces y Sistemas de Apoyo**

- A. Compromiso político con recursos adecuados para la atención y prevención de la TB.
- B. Inclusión y compromiso de las comunidades, las organizaciones de la sociedad civil y de los proveedores de atención públicos y privados.
- C. Cobertura universal en salud y políticas y marcos normativos para la notificación de casos, registros vitales, calidad y uso racional de los medicamentos y control de infección.
- D. Protección social, mitigación de la pobreza y acciones sobre otros determinantes de la TB

### **3. Innovación e intensificación de la Investigación**

- A. Descubrimiento, desarrollo y rápida incorporación de nuevos métodos diagnósticos, vacunas, medicamentos, intervenciones y estrategias
- B. Investigación para optimizar su implementación e impacto y promover las innovaciones

## **4.2. Plan de Acción de la OPS para la Prevención y Control de la TB en las Américas 2016 – 2019**

La OPS acaba de lanzar el **Plan de Acción de para la prevención y el control de la TB 2016 – 2019** (4) con el propósito acelerar la disminución de la carga y muerte por esta enfermedad y cerrar brechas en la detección y en el tratamiento de los casos nuevos sensibles y resistentes y de la coinfección TB/VIH. Se proponen acciones para alcanzar las metas propuestas para el 2025 por la nueva estrategia mundial post 2015 “Fin de la TB”, referentes a la disminución de la incidencia y mortalidad. En vista de que pocos países y territorios de la subregión de Latinoamérica y el Caribe, cumplen el criterio de baja incidencia de TB, el Plan de Acción da prioridad a las acciones encaminadas al control de la tuberculosis y no se enfoca específicamente en las acciones para su eliminación.

#### 4.3. Plan Estratégico de la OPS 2014 – 2019: En pro de la salud: Desarrollo sostenible y equidad

El **Plan Estratégico de la OPS 2014 -2019** (9) enfoca la TB en sus metas 4 y 6:

**Meta 4: Reducir la mortalidad debida a la baja calidad de la atención de salud.** *Reducción de por lo menos 9% en la tasa de mortalidad por causas sensibles a la atención de la salud en el 2019 (77,2 por 100, 000 habitantes), en comparación con el 2014 (84,7 por 100.000 habitantes).*

**Meta 6. Reducir la mortalidad por enfermedades transmisibles.** *Reducción de por lo menos 24% en la tasa de mortalidad por tuberculosis en 2019 (0,8 por 100.000 habitantes), en comparación con el 2014 (1,1 por 100.000 habitantes).*

#### 4.4. Marco de Acción para la Eliminación de la TB en países de baja incidencia

Las regiones, países o poblaciones de baja incidencia o cercanas de alcanzarla deberán priorizar acciones diferentes de los países de incidencia intermedia o alta y tendientes a la búsqueda de la eliminación de la TB. En este sentido, la OMS desarrolló y lanzó el **Marco de Acción para la Eliminación de la Tuberculosis en países de baja incidencia** (7) cuyas actividades se pueden enmarcar en los mismos tres pilares de la **Estrategia Fin de la TB** (6). El Marco de Acción define ocho áreas de acción prioritaria que pueden adaptarse a las condiciones de cada país y cada región, según sus brechas y capacidades, priorizando actividades, definiendo metas ambiciosas pero viables y diseñando estrategias orientadas a cumplir con estas metas. Estas ocho áreas de acción prioritaria se desarrollan a continuación como base de la **Hoja de Ruta para la Eliminación de la Tuberculosis en Latinoamérica y el Caribe**.

### 5. Áreas de acción prioritaria para la eliminación de la tuberculosis en Latinoamérica y el Caribe.

Los países de baja incidencia se caracterizan por una baja tasa de transmisión en la población general, brotes epidémicos ocasionales, concentración de la TB en poblaciones vulnerables y de mayor edad y alto impacto de las migraciones desde zonas de mayor incidencia (7). Las acciones para la eliminación dan prioridad a la identificación y enfoque diferencial de poblaciones y grupos vulnerables, la reducción de la transmisión y de la progresión de la infección latente, las políticas de migración y el aseguramiento del compromiso político con acceso universal a servicios de alta calidad en TB (7, 8).

El **Marco de Acción para la Eliminación de la Tuberculosis en países de baja incidencia** define ocho acciones prioritarias:

1. Aseguramiento del compromiso político, recursos financieros y gerencia para la planeación y la oferta de servicios de alta calidad
2. Enfoque en los grupos más vulnerables y difíciles de alcanzar
3. Enfoque en las necesidades de los inmigrantes y los temas de migración
4. Implementación de cribado (búsqueda sistemática) para TB activa y latente en contactos y grupos de alto riesgo y proporcione el tratamiento adecuado
5. Optimización de la prevención y diagnóstico temprano de la TB resistente a fármacos mediante la realización de examen directo y cultivo en todas las muestras y pruebas de susceptibilidad en todos los cultivos positivos.
6. Aseguramiento de vigilancia continua, programa de monitoreo y evaluación y sistema de información basados en casos
7. Inversión en investigación y nuevos métodos
8. Apoyo a los planes globales de prevención, cuidado y control de la TB

La heterogeneidad de Latinoamérica y el Caribe dificulta la adaptación e implementación de estas acciones para la eliminación. Los países y territorios de baja incidencia deben establecer, fortalecer o renovar sus planes estratégicos con este objetivo (7). También es posible implementar acciones de eliminación en los países de incidencia media que tengan poblaciones o áreas geográficas de baja incidencia y condiciones operativas y disponibilidad de recursos locales que se los permita.

Los países de baja incidencia de la subregión han realizado ocho encuentros en los cuales se han hecho adelantos significativos y se han definido objetivos y metas, muchos de los cuales se ven reflejados en cada una de las áreas de acción y actividades prioritarias mencionadas a continuación (11, 15, 16). Los planes estratégicos, guías de práctica clínica y manuales de operación de los niveles nacional y subnacional, de acuerdo con las condiciones locales, deben precisar los mecanismos de implementación, seguimiento, monitoreo y evaluación de las acciones de eliminación.

#### ***5.1. Aseguramiento del compromiso político, recursos financieros y gerencia para la planeación y la oferta de servicios de alta calidad***

- **Crecimiento del compromiso político con suficientes recursos**
- **Intervención de los determinantes sociales subyacentes**

- **Coordinación gubernamental central con planes estratégicos diseñados para el nivel nacional y adaptables localmente**
- **Mejoramiento de la capacidad y calidad de los sistemas de salud, de la capacidad de laboratorio, de los presupuestos de medicamentos y de la vigilancia de la resistencia y farmacovigilancia.**
- **Protección social**
- **Salud mental**
- **Participación de la comunidad y de todos los actores involucrados**

***Crecimiento del compromiso político con suficientes recursos.*** Las acciones de eliminación de la TB requieren mayor costo e inversión puesto que implican diagnósticos más tempranos, cuando la enfermedad es paucibacilar, y más precisos, con conocimiento de los patrones de resistencia, en poblaciones más difíciles de alcanzar, con mayor riesgo de resistencia y pérdida de seguimiento. El reto para todas las instancias y para los programas en particular es explicar al nivel gubernamental y no gubernamental que dispone de los recursos y los mecanismos para la financiación porque si la morbilidad y la mortalidad por TB se reducen es necesario incrementar los recursos. Se requiere aumentar el compromiso político e innovar y fortalecer las estrategias de financiación de las acciones contra la TB (4, 22, 23). Los países y territorios de Latinoamérica y el Caribe que aborden acciones de eliminación deben prever la disminución de aportes de fuentes externas como el Fondo Mundial, garantizando la sostenibilidad financiera de estas acciones.

***Intervención de los determinantes sociales subyacentes.*** Aunque se parte de la premisa que los países de baja incidencia tienen mejores indicadores socioeconómicos que otros países de la subregión de Latinoamérica y el Caribe, no se puede dejar de prestar atención al mejoramiento continuo de los principales determinantes de la situación de TB definidos para la subregión: baja inversión en salud per cápita, baja accesibilidad a los servicios de salud, menor expectativa de vida al nacer y menores tasas de detección de TB (19).

***Coordinación gubernamental central con planes estratégicos diseñados para el nivel nacional y adaptables localmente.*** Es fundamental que se establezca o mantenga una coordinación central bajo administración gubernamental (Política y Estrategia Nacional de TB) que garantice el desarrollo de un plan estratégico nacional para la eliminación de la TB (24), incrustado en planes sociales, dedicado a la salud pública, con infraestructura adecuada, que pueda abordar todos los aspectos de prevención y atención a la TB y que se asegure adecuada vigilancia y control (4, 6, 7).

**Mejoramiento de la capacidad y calidad de los sistemas de salud.** La ampliación de la cobertura y el mejoramiento de la calidad de los servicios y las acciones en TB se fundamenta en el aumento de la cobertura y la calidad de los sistemas de salud de manera general (23, 25, 26). Este precepto adquiere mayor validez para las acciones de eliminación que suponen diagnósticos más tempranos, poblaciones más difíciles de adherir a la terapia y mayor actividad extramural. Es necesario crear unidades especializadas para las situaciones complejas manteniendo un nivel de centralización apropiado de algunas responsabilidades.

Frente a la eliminación de la TB, el nivel gubernamental debe ajustar, mejorar e innovar su organización y estrategia para el cumplimiento de sus funciones principales: 1) Formulación de políticas, normas, lineamientos y protocolos incorporados en el marco legal y normativo nacional; 2) Garantía de la atención integral de alta calidad, con mecanismos sólidos de información, notificación y derivación entre atención primaria, hospitales y servicios especializados, públicos y privados; 3) Planificación de los recursos humanos y fortalecimiento de su capacidad; 4) Ampliación y mejoramiento de la calidad de la red de servicios de laboratorio; 5) Garantía del suministro ininterrumpido de medicamentos; 6) Mejoramiento e innovación del sistema de recolección de información y análisis de datos de alta calidad; y, 7) Definición de un sistema de vigilancia, seguimiento y evaluación programática en todos los niveles del sistema de salud.

El compromiso político es también necesario para planteamientos normativos esenciales para la eliminación, incluyendo leyes efectivamente implementadas y aplicadas, como es el caso de la atención integral, la protección social y el enfoque diferencial para poblaciones vulnerables: habitantes de calle y grupos marginados en las grandes ciudades, adictos a drogas ilícitas, privados de la libertad, indígenas, discriminados por condiciones de género o sexualidad, entre otras (27).

**Protección social.** La tuberculosis es una enfermedad social (27, 28). No es posible la eliminación de la TB sin contar con sistemas de protección social que den cobertura a todos los pacientes independientemente de la capacidad de pago de servicios y sin discriminación alguna, lo cual compete no sólo al sector salud sino a todos los sectores (29-31). La frecuencia de condiciones socioeconómicas deficientes y falta de apoyo familiar es alta entre los pacientes con TB. Hay una gran variación en Latinoamérica y el Caribe de los Sistemas de Protección Social entendida ésta como un mecanismo fundamental, encabezado y regulado por el estado, para contribuir a la plena realización de los derechos económicos y sociales de la población (31).



**Salud mental.** Aunque no necesariamente relacionado con estas condiciones deficientes, las alteraciones de la salud mental de los pacientes con TB son de igual forma muy frecuentes y requieren atención especial por su asociación frecuente con la pérdida al seguimiento y resultados no satisfactorios del tratamiento (32, 33). Deben definirse recursos, infraestructura, recurso humano y mecanismos específicos, acordes con la situación local, para la identificación e intervención de las alteraciones de la salud mental de pacientes y sus familias.

**Participación de la comunidad y todos los actores involucrados.** La participación activa de la comunidad en la solución de los problemas de salud es una necesidad y un reto fundamental para los gobiernos, los sistemas de salud y la misma sociedad, particularmente en el caso de la TB, cuyos determinantes sociales son en gran parte el origen y la barrera para la solución del problema (34). Se requiere también el esfuerzo de investigadores locales y servicios sociales, profesionales de la salud pública y el sector privado. La participación de los servicios de salud penitenciarios, departamentos de salud ocupacional, las autoridades de inmigración y especiales de salud y servicios sociales para grupos vulnerables debe ser considerado.

**Monitoreo del compromiso político.** Como indicador de monitoreo del crecimiento del compromiso político se plantea hacer una estimación de los costos anuales de las actividades programáticas necesarias para dar cumplimiento al plan de eliminación de la tuberculosis y, estableciendo como meta la cobertura del 100% de tales costos anuales, usar como indicador el porcentaje de cumplimiento de la meta y así de manera constante para los años subsecuentes.

## **5.2. Enfoque en los grupos más vulnerables y difíciles de alcanzar**

- **Identificación y caracterización de grupos de alto riesgo (poblaciones vulnerables) por mayor riesgo de infección y progresión a enfermedad, alta incidencia o dificultad de acceso**
- **Análisis e intervención de las barreras de acceso y adherencia**
- **Intervención de los determinantes sociales subyacentes**
- **Manejo interprogramático para enfrentar factores de riesgo como infección VIH, diabetes mellitus, tabaquismo, abuso de alcohol, dependencia de drogas ilícitas y trastornos de la salud mental**
- **Manejo intersectorial para enfrentar los determinantes educativos, sociales y económicos de la enfermedad**
- **Acciones de prevención, diagnóstico y tratamiento ajustadas a las condiciones particulares de cada población vulnerable**

Uno de los pasos principales hacia la eliminación de la TB es la identificación de las poblaciones en mayor riesgo de adquirir o desarrollar TB, o poblaciones vulnerables, y la focalización de acciones en ellas (35). Hay variación geográfica significativa por lo cual cada región, país o localidad, especialmente en los países de baja incidencia, debe realizar esta identificación (4). Entre las poblaciones y grupos de mayor riesgo se encuentran los infectados por el VIH, adictos a drogas ilícitas, privados de la libertad, inmunocomprometidos por enfermedad o medicamentos (terapias biológicas, quimioterapia y otros), habitantes de calle o población en situación de indigencia, migrantes desde países o zonas de alta incidencia de TB, indígenas, afrodescendientes y personal de salud. Estas poblaciones se concentran en las grandes ciudades representando un reto para las estrategias de eliminación en este escenario (36). Otros factores de riesgo como la diabetes mellitus, el tabaquismo y el abuso del alcohol, aunque se asocian individualmente con menor riesgo de TB, han adquirido gran importancia por su alta y creciente frecuencia en la población general (37-40).

Cada población vulnerable requiere acciones específicas encaminadas al diagnóstico temprano y el tratamiento, tanto de la TB activa como de la TB latente, que deben ser priorizadas y complementadas con los mecanismos de cooperación necesarios para ampliar su cobertura e impacto (41). El enfoque diferenciado de acuerdo con las condiciones particulares de cada población vulnerable es un reto para el trabajo intrasectorial, intersectorial, multi e interdisciplinario, con la participación de la comunidad y de las mismas poblaciones afectadas. Para cada una de ellas se requiere un análisis y un abordaje de las barreras de acceso al diagnóstico y al tratamiento, así como a la adherencia a éste, para aumentar las tasas de éxito y disminuir las tasas de mortalidad (41-43).

Las situaciones sociales, económicas, sanitarias y educativas identificadas como determinantes de la TB deben ser abordadas desde un punto de vista intersectorial, promoviendo la inclusión de las personas afectadas por TB en los programas de protección social y de reducción de la pobreza, así como la participación activa de la comunidad y de las organizaciones de la sociedad civil (19, 26-29, 34, 36).

La detección temprana de la TB en poblaciones vulnerables y difíciles de alcanzar, el tratamiento integral y el manejo de las comorbilidades, incluidas las alteraciones de la salud mental, requieren un enfoque interprogramático (4, 36). La buena articulación con los programas de VIH es crucial en el camino hacia la eliminación de la TB (44).

### ***5.3. Enfoque en las necesidades de los inmigrantes y los temas de migración***

- **Definición de políticas migratorias, colaborativas entre los países, en relación con la TB que protejan los derechos humanos de los migrantes y busquen eliminar la estigmatización.**
- **Cribado para enfermedad activa y TB latente en migrantes (pre y/o post entrada)**
- **Accesibilidad de los inmigrantes a servicios de salud de buena calidad con sensibilidad al encuentro intercultural (reducción de las barreras de idioma) y garantía de diagnóstico y tratamiento completo en los países receptores**
- **Caracterización y vigilancia epidemiológica de los grupos de inmigrantes**
- **Intervención de determinantes sociales en poblaciones de inmigrantes**

***Definición de políticas migratorias, colaborativas entre los países, en relación con la TB que protejan los derechos humanos de los migrantes y busquen eliminar la estigmatización.*** Las migraciones tienen un alto impacto negativo en la situación de la TB en países de baja y media incidencia (45-47). La dinámica de las migraciones ha cambiado significativamente en Latinoamérica y el Caribe en las últimas décadas (48). La migración entre países latinoamericanos ha aumentado, particularmente entre países fronterizos, con migraciones sur-sur crecientes (48). Se requiere contar con políticas migratorias concertadas de manera multilateral que protejan los derechos humanos y garanticen la accesibilidad de los inmigrantes a servicios de salud de buena calidad que busquen superar las barreras idiomáticas y culturales (7, 47, 49, 50). La colaboración entre países y la legislación nacional deben garantizar funcionalidad y acceso a los servicios de TB (cribado, diagnóstico y tratamiento), sin carga financiera para los inmigrantes independientemente de su estatus, incluyendo los grupos de indocumentados y los inmigrantes sin residencia completa (7, 43, 49-52).

***Cribado para enfermedad activa y TB latente en migrantes (pre y/o post entrada).*** El cribado sistemático para la infección tuberculosa latente (ITBL) puede ser realizado a lo largo de la vía de migración, centrándose en grupos de riesgo de exposición y progresión a enfermedad, y vinculado a estrategias de quimioprofilaxis (53-56). Estas intervenciones deben incluir el estudio de contactos y manejo de brotes entre los migrantes. El cribado previo a la migración requiere inversión en diagnóstico y tratamiento en los países de partida, de manera conexas con los programas nacionales de Tuberculosis y todas sus acciones y procesos programáticos, en particular los sistemas de vigilancia y estableciendo sistemas de referencia transfronterizos con

seguimiento e intercambio de información (54). El derecho a terminar el tratamiento en el país donde se hace el diagnóstico debe ser garantizado para los inmigrantes con TB, o debe confirmarse que los pacientes puedan cumplir el esquema completo en el lugar donde se desplace, minimizando el riesgo de salud pública (50-52).

En vista de que la exclusión inicial de TB activa y de ITBL por cribado activo de migrantes no excluye la posibilidad de ocurrencia de TB en el futuro, debe garantizarse acceso continuo a la atención sanitaria, seguimiento individual e intervenciones preventivas (7, 47).

***Accesibilidad de los inmigrantes a servicios de salud de buena calidad con sensibilidad al encuentro intercultural (reducción de las barreras de idioma) y garantía de diagnóstico y tratamiento completo en los países receptores.*** Es necesaria la sensibilización del personal médico y administrativo frente a los perfiles de salud y las necesidades especiales de los migrantes para construir competencia cultural (47, 52). El diagnóstico, tratamiento y atención de la TB deben integrarse dentro de los servicios de salud en general, pero se requieren esfuerzos especiales para llegar a los migrantes en los centros para refugiados o solicitantes de asilo y acciones específicas para cada grupo identificado (41). La detección de TB en inmigrantes debe seguir los principios éticos establecidos para la investigación de enfermedades infecciosas y observar los principios de derechos humanos, salvaguardándolos contra el estigma, la discriminación y expulsión (47, 52, 55, 57).

***Caracterización y vigilancia epidemiológica de los grupos de inmigrantes.*** Se deben realizar evaluaciones epidemiológicas para explorar si la TB en inmigrantes es un reto prioritario y definir subgrupos de migrantes que tengan un mayor riesgo de TB. Para esto es necesario contar con sistemas de registro apropiados que, bajo condiciones de confidencialidad, permitan una vigilancia estrecha de los grupos de inmigrantes (54, 57).

***Intervención de determinantes sociales en las poblaciones de inmigrantes.*** Las comunidades de migrantes deben estar al alcance de acciones de comunicación, movilización social y salud. Se requieren políticas intersectoriales audaces para identificar e intervenir los aspectos de vulnerabilidad de los migrantes como el acceso deficiente a los servicios de salud, así como para buscar y establecer soluciones compartidas entre los sectores sanitarios y no sanitarios, las autoridades migratorias, los servicios sociales y el sector laboral. Pueden requerirse medidas de protección social especial para los migrantes con TB o riesgo de TB (47, 50-52).

#### ***5.4. Implementación de cribado (búsqueda sistemática) para TB activa y latente en contactos y grupos de alto riesgo, fortalezca las acciones de detección temprana en la población general y proporcione tratamiento supervisado adecuado***

- **Fortalecimiento de la cobertura y alcance del estudio de contactos con ampliación de la capacidad para el diagnóstico y tratamiento de la TB activa y la TB latente**
- **Mejoramiento de la capacidad de identificación y manejo de los brotes epidémicos**
- **Ampliación de la cobertura y alcance de las acciones de diagnóstico y tratamiento de la TB activa, sensible y resistente, y de la TB latente en poblaciones de riesgo bajo con un enfoque de priorización ajustado a un análisis de costo- beneficio**
- **Seguimiento y vigilancia de las poblaciones en tratamiento para TB activa o latente con garantía de supervisión del tratamiento, tanto en los casos sensibles como en los resistentes**

***Fortalecimiento de la cobertura y alcance del estudio de contactos y otros grupos de riesgo con ampliación de la capacidad para el diagnóstico y tratamiento de la TB activa y la TB latente.*** La detección temprana y el tratamiento exitoso de casos de TB activa, como acción básica del control de la TB, siguen siendo prioritarios en el contexto de su eliminación, para minimizar las consecuencias en el enfermo y ayudar a reducir su transmisión (6, 8, 58-60). En países o zonas de baja incidencia de TB, con el enfoque de la eliminación, estas acciones se deben priorizar en los grupos de alto riesgo y se debe monitorizar y evaluar permanentemente la efectividad de las políticas y de las acciones programáticas orientadas a la detección y tratamiento de TB en estos grupos (7).

Si se tuvieran en cuenta, como fuente de los casos nuevos de TB, solamente los casos derivados de la reactivación de la TB de la población actualmente infectada, usando una tasa medida de reactivación de 5% a lo largo de la vida, la eliminación de la TB no sería posible. La eliminación es entonces inconcebible sin acciones innovadoras de diagnóstico y tratamiento de la ITBL.

Con este mismo enfoque de la eliminación, es esencial la búsqueda de TB latente en poblaciones en riesgo (7, 8, 61, 62), con énfasis en contactos cercanos de pacientes con TB, especialmente en los niños menores de 5 años de edad (62, 63), en personas con alteraciones de inmunidad como infección por VIH (64, 65) o en tratamiento con

inhibidores de TNF-alfa, en personas con silicosis, insuficiencia renal y candidatos a trasplante de órganos, y prescribir quimioprofilaxis a quienes esté indicado (62). La ampliación de los grupos en riesgo, candidatos a terapia para ITBL, debe ser progresiva incluyendo todos los contactos, en particular los niños y adultos mayores, independientemente de su edad.

El estudio y tratamiento sistemáticos de la ITBL en otras poblaciones en riesgo debe ser también priorizada en países o áreas *geográficas* de baja y media incidencia de TB como parte de los planes estratégicos encaminados a la eliminación. Estas poblaciones incluyen, entre otras, personas privadas de la libertad, personal sanitario, inmigrantes procedentes de países con una carga elevada de TB, personas sin hogar (habitantes de calle) y consumidores de drogas ilícitas (62, 66). La búsqueda de los casos-fuente debe ser realizada especialmente cuando sea diagnosticada la TB en niños menores de cinco años.

***Mejoramiento de la capacidad de identificación y manejo de los brotes epidémicos.*** Un brote epidémico se define como la presencia de un mayor número de casos de los esperados en un territorio o en una población, durante un período en particular, con evidencia de transmisión reciente de *M. tuberculosis* entre esos casos (67). La vigilancia estricta, con identificación y estudio de casos en el espacio y tiempo real, preferiblemente acompañada de genotipificación, es necesaria para detectar tempranamente brotes de TB, tanto en poblaciones vulnerables como en la comunidad (60), centros de atención sanitaria (68) u otras instituciones o grupos de riesgo (69, 70).

***Ampliación de la cobertura y alcance de las acciones de diagnóstico y tratamiento de la TB activa, sensible y resistente, y de la TB latente en poblaciones de riesgo con un enfoque de priorización ajustado a un análisis de costo- beneficio.*** En el contexto de la eliminación el diagnóstico temprano de la TB activa es fundamental (60). En este mismo contexto, a medida que se reducen los casos de enfermedad activa adquieren cada vez mayor importancia el diagnóstico y el tratamiento de la ITBL (7). La detección temprana parte de acciones de educación a la comunidad que promuevan la consulta temprana ante síntomas respiratorios crónicos, especialmente tos. La búsqueda activa de casos incluye la identificación sistemática de individuos en los cuales se sospecha TB activa en grupos diana predeterminados y requiere la utilización de pruebas que permitan el diagnóstico rápido de la enfermedad, con mejores resultados individuales y colectivos. Se debe promover el uso del cultivo y, en las poblaciones vulnerables, de las pruebas moleculares de mejor rendimiento costo-beneficio como el GeneXpert MTB/RIF. Las decisiones acerca de cuándo y cómo estudiar los grupos de bajo riesgo y los grupos de riesgo prioritarios y acerca de los

algoritmos a utilizar para la pesquisa y diagnóstico dependerán de la situación epidemiológica, la capacidad de los sistemas de salud y la disponibilidad de recursos (71).

Aunque ninguna población en riesgo debe ser ignorada, la priorización de las acciones debe tener en cuenta los riesgos, beneficios y costos del diagnóstico y tratamiento de la ITBL de cada población, considerando inicialmente a aquellos con mayor riesgo de progresión de infección a enfermedad y difícil acceso a los servicios de atención sanitaria (8, 72, 73).

***Seguimiento y vigilancia de las poblaciones en tratamiento para TB activa o latente con garantía de supervisión del tratamiento, tanto en los casos sensibles como en los resistentes.*** Cada programa debe contar con personal capacitado suficiente y estrategias complementarias para asegurar que todos los pacientes reciban su tratamiento de manera supervisada. Se debe anticipar la necesidad de movilización del personal sanitario hacia la comunidad para recuperar a aquellos pacientes con poco apego. En comunidades alejadas o de difícil acceso se deben aplicar estrategias locales como la capacitación de voluntarios, familiares u otras instancias que apoyen la supervisión del tratamiento (74). Esto ayudará no solo a asegurar la curación, sino también a la detección de efectos adversos a los medicamentos, causa frecuente de abandono principalmente en los pacientes resistentes. La supervisión del tratamiento beneficiará principalmente a los grupos de alto riesgo. La supervisión con apoyo de agentes de la comunidad es una estrategia que puede resultar más efectiva en algunos escenarios (75). Se deben implementar acciones para minimizar los factores asociados con la pobre adherencia al tratamiento y evitar la interrupción del mismo.

En vista de que los pacientes con VIH/SIDA constituyen uno de los grupos de riesgo más importantes, se debe mejorar la coordinación interprogramática (programas de TB y VIH) en los diferentes niveles del sistema de salud para reducir la mortalidad debida a la coinfección TB/VIH y ofrecer atención integral siguiendo las actividades de colaboración recomendadas internacionalmente con aumento de coberturas de la terapia preventiva con isoniazida y la terapia antiretroviral (44, 65, 76, 77) .

### ***5.5. Optimización de la prevención y el manejo de la TB resistente a fármacos***

- **Acceso universal a PSF de primera línea a todos los pacientes con TB y segunda línea a todos los previamente tratados o con MDR inicial**



- **Fortalecimiento de la capacidad de los laboratorios con énfasis en las pruebas moleculares de mejor relación costo – rendimiento como GeneXpert**
- **Lineamientos nacionales para el manejo de la TB resistente con garantía de disponibilidad de medicamentos para el tratamiento apropiado de la TB resistente y garantía de supervisión.**
- **Soporte y protección social a las poblaciones con TB resistente**
- **Caracterización epidemiológica nacional y local en cuanto a resistencia a fármacos y establecimiento de sistemas de vigilancia de la resistencia**
- **Creación de grupos o comités de expertos, reconocidos por los programas nacionales y por las redes de prestación de servicios**

Se recomienda el seguimiento de la actualización a 2016 de las Guías de la OMS para el manejo de la TB resistente a fármacos (78-80). En este sentido, se hace énfasis en la necesidad de implementar en la subregión de Latinoamérica y el Caribe los esquemas acortados para TB MDR propuestos por la OMS cuya duración es de 9 a 12 meses (78).

***Acceso universal a PSF de primera línea a todos los pacientes con TB y segunda línea a los previamente tratados, con monorresistencia a rifampicina o con MDR inicial.*** La resistencia a fármacos anti TB es uno de los principales retos para la eliminación de la TB en el mundo (81). Las acciones encaminadas a la eliminación de la TB deben priorizar el diagnóstico oportuno de la resistencia en general y particularmente de la TB-MDR y la TB-XDR (81). El acceso a PSF de primera línea debe ser universal para todos los pacientes con diagnóstico de primera vez y estudio bacteriológico positivo, tengan o no factores de riesgo de resistencia identificados, y a PSF de segunda línea para todos los previamente tratados o con resistencia a rifampicina o isoniazida (78, 80-83).

***Fortalecimiento de la capacidad de los laboratorios con énfasis en las pruebas moleculares de mejor relación costo – rendimiento como GeneXpert.*** Las pruebas moleculares no reemplazan las pruebas convencionales pero tienen la ventaja de permitir la toma rápida de decisiones, particularmente con la técnica GeneXpert, y se debe fomentar su disponibilidad (80, 82, 84-86). El GeneXpert permite un diagnóstico preciso de la TB y de la resistencia a rifampicina. Aunque en muchos escenarios se ha demostrado que las pruebas moleculares rápidas, especialmente GeneXpert MTB/RIF, son una estrategia costo-efectiva (87, 88), su uso generalizado en la población de sintomáticos respiratorios sin factores de riesgo (no pertenecientes a poblaciones vulnerables reconocidas) debe fundamentarse en un análisis cuidadoso de costo-efectividad a nivel local o nacional (89). Aquellos países y territorios que no tengan la capacidad actual de implementar el uso generalizado de GeneXpert MTB/RIF o en los

que no sea evidente su costo-efectividad favorable, puedan aplicarlas a grupos seleccionados con mayor riesgo de resistencia a rifampicina o TB-MDR como personas con resultados desfavorables de la terapia, pacientes tratados por TB en el pasado o con TB asociada al VIH, contactos intradomiciliarios en áreas endémicas de TB-MDR, pacientes diabéticos, prisioneros y personal de salud.

El Laboratorio Nacional debe definir los estándares de calidad de las pruebas utilizadas para el diagnóstico de la TB, incluidas las nuevas pruebas moleculares, y vigilar su cumplimiento, para lo cual se debe apoyar en la red nacional de laboratorios (82, 85). La oferta privada debe estar regulada y articulada. Adicionalmente al fortalecimiento de las redes de laboratorio de TB y a la oferta universal de PSF de primera línea, con pruebas moleculares y convencionales, a todos los afectados por TB confirmados por bacteriología, se debe ampliar la capacidad para ofrecer PSF de segunda línea para todos los casos previamente tratados y aquellas no tratados con resistencia a medicamentos de primera línea (78, 82, 84, 90).

***Lineamientos nacionales para el manejo de la TB resistente con garantía de disponibilidad de medicamentos para el tratamiento apropiado de la TB resistente.*** Se debe garantizar la accesibilidad a los fármacos de segunda línea y asegurar el cumplimiento de las normas de tratamiento, manteniendo el concepto de DOT, junto a medidas educativas y apoyo, incluyendo ayuda económica a pacientes y cuidadores (78, 82, 91, 92). La menor duración de los tratamientos de TB-MDR reduce los costos y favorece la adherencia, lo que ha llevado a intensificar la investigación en esquemas acortados para TB-MDR. Habiéndose comprobado la eficacia de algunos de estos esquemas, la OMS recomienda el tratamiento acortado (9 a 12 meses) en pacientes con TB-MDR que no tengan resistencia a quinolonas o medicamentos inyectables y no hayan recibido medicamentos de segunda línea previamente (78). No se recomienda, por no haberse estudiado, en mujeres embarazadas o en TB extrapulmonar (48).

Se requiere investigación en medicamentos más efectivos, asequibles y seguros para mejorar los resultados del tratamiento, vinculada a farmacovigilancia para promover un uso más seguro de medicamentos y el manejo de los efectos secundarios (93, 94).

***Soporte y protección social a las poblaciones con TB resistente.*** Además de los sistemas de protección social, entendidos como políticas estatales de inclusión para enfrentar la pobreza y otros determinantes del estado de salud, que son imprescindibles en el camino hacia la eliminación de la TB (29, 31), es necesario ampliar las redes de soporte familiar y social mediante la inclusión de la comunidad (34). El apoyo debe extenderse más allá de la curación y abordar cualquier secuela

asociada con la TB. El acceso a cuidados paliativos y medidas de acompañamiento al final de la vida es esencial, especialmente para las personas con M/XDR-TB (78, 95).

***Caracterización epidemiológica nacional y local en cuanto a resistencia a fármacos y establecimiento de sistemas de vigilancia de la resistencia.*** Los países deben contar con sistemas de vigilancia de la resistencia a fármacos anti TB y acciones preventivas del desarrollo de resistencia, especialmente medidas de uso racional de medicamentos, respaldada en lineamientos o normas nacionales y mecanismos que aseguren la correcta prescripción y cumplimiento de las normas (82, 96, 97).

***Creación de grupos o comités de expertos, reconocidos por los programas nacionales.*** Es necesario fomentar la formación de grupos de expertos que actúen bajo la figura de Comités o de Foros de Expertos, reconocidos por los PNT, para el manejo apropiado de los casos complejos de resistencia o de difícil tratamiento (98).

#### ***5.6. Aseguramiento de vigilancia continua, programa de monitoreo y evaluación y sistema de información basados en casos***

- **Fortalecimiento de la notificación obligatoria con mejoramiento de las plataformas de registro individual y garantía de confidencialidad**
- **Implementación de un sistema de monitoreo de la calidad de la información**
- **Definición e implementación de un paquete de indicadores clave para uso por un sistema de monitoreo y evaluación en mejoramiento continuo**
- **Mejoramiento de la vigilancia epidemiológica usando tecnología molecular**
- **Sistema de evaluación periódica del impacto de la implementación de nuevas estrategias**
- **Articulación de los sistemas de información en Tuberculosis con los sistemas de evaluación de otros programas y otros sectores**

***Fortalecimiento de la notificación obligatoria con mejoramiento de las plataformas de registro individual y garantía de confidencialidad.*** La notificación de la TB debe ser obligatoria en todos los niveles, discriminar las diferentes formas de la enfermedad e incluir el perfil de resistencia de cada caso. Datos sobre el lugar de residencia y de los movimientos recientes de los pacientes permiten hacer análisis de georreferenciación en periodos específicos de tiempo y definir acciones en salud pública más pertinentes, especialmente en casos de brotes epidémicos. Se requieren identificadores únicos y datos biométricos, salvaguardando los principios de confidencialidad, para un mejor seguimiento de los pacientes (76, 99-101). La práctica de registrar los datos individuales de los pacientes de TB debe ser mantenida y fortalecida.

La notificación de la TB en niños merece atención especial. Tanto los casos de TB activa como fuente de detección de casos fuente como los casos de ITBL en niños contacto de pacientes con TB. Las tasas de TB en niños, activa y de ITBL que reciben quimioprofilaxis ayudan a determinar las tendencias en la transmisión y la incidencia y ayudan a evaluar el impacto de las medidas de intervención programática y refinarlas (101, 102).

***Implementación de un sistema de monitoreo de la calidad de la información.*** Los sistemas de vigilancia deben garantizar la calidad de los datos con respecto a la exhaustividad, puntualidad, consistencia y validez, con evaluación periódica de las normas y criterios del sistema de vigilancia de TB (82, 103, 104).

***Definición e implementación de un paquete de indicadores clave para uso por un sistema de monitoreo y evaluación en mejoramiento continuo.*** Es necesario desarrollar indicadores en función del contexto del país y mejorar la capacidad de análisis de la información recolectada (76, 82, 100).

***Mejoramiento de la vigilancia epidemiológica usando tecnología molecular.*** Los sistemas de vigilancia futura deberán aprovechar el avance de la ciencia en tecnología de la información para mantener a todo el personal en salud al tanto de los avances en técnicas de diagnóstico y tratamiento de la TB y su implementación bajo lineamientos programáticos (103). La capacitación en el uso de las tecnologías de registro y consulta de información deberá tener la misma prioridad que la capacitación en otras normas. El acceso inmediato a resultados que se generan automáticamente se está convirtiendo cada vez más en ayuda para orientar los tratamientos (99, 103). Estos métodos pueden incluir conexión con los datos del paciente (estadística demográfica, clínica, geo-posicionamiento e información socioeconómica) y estudios moleculares (huellas del ADN de cepas) para la investigación de brotes o casos vinculados. La farmacovigilancia podría integrarse sistemáticamente en el marco de control de la Tuberculosis (105, 106)

***Sistema de evaluación periódica del impacto de la implementación de nuevas estrategias.*** Los planes estratégicos de orden global, regional, nacional o local deben contemplar mecanismos de evaluación periódica de su implementación e impacto que permitan establecer el cumplimiento y cuantificar los resultados (24, 76). Los países de baja incidencia tendrán indicadores diferentes enfocados especialmente en evaluar el impacto en poblaciones de riesgo (7).

***Articulación de los sistemas de información en tuberculosis con los sistemas de evaluación de otros programas y otros sectores.*** El futuro debe contemplar mayor racionalización en los registros de mortalidad y articulación de la información en redes compartidas dentro del sistema de salud, nuevamente bajo criterios de estricta confidencialidad, con datos interoperables a través del sistema: hospitales, centros de

atención primaria, laboratorios y sistemas de gestión de pacientes, para garantizar que una información más completa y oportuna esté disponible para los médicos y profesionales de la salud pública. Los vínculos de la información con la vigilancia de otras enfermedades, tales como VIH y otras comorbilidades de TB incluyendo la diabetes, debe ser explorado (44).

### ***5.7. Inversión en investigación y nuevos métodos***

- **Construcción de capacidad para la investigación: Identificación, fortalecimiento y promoción de creación de grupos de investigación en tuberculosis y establecimiento de una red de investigación**
- **Definición de prioridades en investigación con foco en la investigación operativa**
- **Movilización de recursos para la investigación y la implementación de innovación**
- **Traslación ágil de los resultados de investigación en acciones programáticas y en la definición de políticas públicas en tuberculosis**

El solo mejoramiento de las intervenciones y acciones actualmente disponibles no permitirá la eliminación de la TB. Esta sólo se ve posible si además de todas las estrategias de mejoramiento se logra contar, por medio de la investigación, con vacunas altamente eficaces, métodos de diagnóstico temprano más sensibles y tratamientos más cortos y efectivos, tanto de la TB activa como de la ITBL.

***Construcción de capacidad para la investigación: Identificación, fortalecimiento y promoción de creación de grupos de investigación en tuberculosis y establecimiento de una red de investigación.*** Para la eliminación de la TB se necesitan nuevos modelos de prestación de servicios y tecnología, así como desarrollar y evaluar nuevas vacunas, medicamentos y regímenes terapéuticos más efectivos y seguros para ITL, TB sensible y TB MDR, que requieren intensificar la investigación y la innovación (107, 108). La implementación de nuevos medicamentos debe sustentarse en guías internacionales o locales sólidas basadas en evidencia y ajustarse a las condiciones locales (107, 108).

Es recomendable la creación de grupos y una red de investigación que se enfoque principalmente en la investigación operativa, es decir aquella que busca responder a las brechas programáticas, que haga más eficiente el uso de recursos y mejore el impacto de las acciones. Se debe apoyar la investigación competitiva, influir la agenda de los institutos de investigación y movilizar recursos financieros (6, 7, 82). Los

programas nacionales deben promover la creación y hacer parte de la red de investigación independientemente de que no hagan la labor de coordinación de ella.

***Definición de prioridades en investigación con foco en la investigación operativa (la que responde a brechas programáticas).*** La investigación operativa debe enfocarse en el mejoramiento de las brechas más importantes lo cual incluye el estudio y análisis de la distribución de la TB en la población, las barreras específicas al acceso de los grupos de riesgo y la capacidad de los sistemas de salud para el cumplimiento de sus funciones específicas (109).

***Movilización de recursos para la investigación y la implementación de innovación.*** Los países deben fomentar la investigación y la innovación con mejoramiento de la capacidad nacional y regional en investigación acorde a protocolos internacionales. Se deben elaborar planes de investigaciones operativas en función de las necesidades de cada país, colaborando en la investigación básica y clínica en nuevas herramientas e investigación epidemiológica, social y operativa (109).

Se requiere inversión en nuevas tecnologías diagnósticas y elaboración de algoritmos de utilización que permitan tamizar adecuadamente grupos de alto riesgo para ITL y TB activa, conducción de estudios clínicos sobre métodos diagnósticos de TB MDR y monitoreo temprana de la emergencia de resistencia (107).

***Traslación ágil de los resultados de investigación en acciones programáticas y en la definición de políticas públicas en tuberculosis.*** Los resultados de las investigaciones realizadas deben ser utilizados para contribuir a las políticas nacionales y globales. Para este propósito, se debe contar con buenos sistemas de priorización de la investigación, planificación y ejecución tanto a nivel nacional como internacional. La implementación de las nuevas herramientas en los diferentes niveles de atención debe ser gradual y ajustada a las condiciones locales.

#### ***5.8. Apoyo a los planes globales de prevención, cuidado y control de la TB***

- **Interconexión global de acciones con participación transnacional, intersectorial, interprogramática e interdisciplinaria.**
- **TB como una prioridad de salud nacional.**
- **Abogacía y visibilidad de la TB y de las acciones para enfrentarla**
- **Contribución a la vigilancia, monitoreo y evaluación global**

***Interconexión global de acciones con participación transnacional, intersectorial e interdisciplinaria.*** La eliminación de la TB no puede concebirse con acciones aisladas de países o regiones. La TB es uno de los mejores ejemplos de que se requiere interconexión global de acciones con participación transnacional, intersectorial e interdisciplinaria. Los sistemas de salud y los procesos de reforma deben mantener la TB como una prioridad de salud nacional, con apoyo a planes estratégicos nacionales basados o conexos con la estrategia global de la TB a través de mecanismos bilaterales y multinacionales, con apoyo financiero, asistencia técnica, intercambio de tecnología, colaboración en investigación y fortalecimiento de capacidades (6, 110).

***TB como una prioridad de salud nacional.*** La eliminación de la TB requiere de planes estratégicos nacionales conexos con la estrategia global. Fin de la TB que contemplen mecanismos multinacionales de apoyo financiero, asistencia técnica, intercambio de tecnología, colaboración en investigación y fortalecimiento de capacidades. La obtención de recursos financieros adicionales para la prevención y atención de la TB depende de que esta enfermedad permanezca en la agenda pública internacional (22, 23, 82).

***Abogacía y visibilidad de la TB y de las acciones para enfrentarla.*** La participación activa y apoyo de los países de altos ingresos y baja incidencia, son esenciales para la eliminación de la TB (6, 82).

***Contribución a la vigilancia, monitoreo y evaluación global.*** Los sistemas de monitoreo y evaluación deben ser rigurosos en el seguimiento y mejoramiento de las actividades programáticas encaminadas a la eliminación de la TB y su impacto. Deben medir el progreso y asegurar la implementación de la estrategia global participando en la vigilancia global, la prevención, atención y control de la TB (99, 110).

Las herramientas de evaluación deben diseñarse localmente y ser específicas para cada indicador. El personal que realizará estas actividades debe estar entrenado, se debe tener una calendarización de las evaluaciones que se cumpla al 100% y usar como indicador el porcentaje de cumplimiento.

## **6. Indicadores de monitoreo y evaluación**

La implementación de acciones prioritarias encaminadas a la eliminación de la TB, en el marco del Plan de acción para la prevención y el control de la tuberculosis en las Américas, 2016-2019 (4) requiere monitoreo y evaluación (M&E) periódica (7, 76, 82), que permita medir la eficiencia de las intervenciones llevadas a cabo en el



cumplimiento de los objetivos y de los indicadores del Plan y ajustar y reforzar las intervenciones necesarias para cumplir la misión de poner fin a la epidemia de TB.

Para la hoja de Ruta para la Eliminación de la TB en Latinoamérica se adoptan los objetivos y metas definidos por el Plan de Acción (4) y el Plan Estratégico 2014 – 2019 definidos por la OPS (9). Dado que estos planes no están enfocados en la eliminación, **los hitos, las metas y los indicadores para cada una de las ocho acciones prioritarias se deben ajustar a nivel regional y de los países.** En los años 2020 y 2025 se realizará M&E siguiendo métodos estandarizados.

En la VIII Reunión de Países de Baja Incidencia de las Américas, realizada en julio de 2016 en Santiago de Chile, se presentó un panorama de los avances hechos por los países en las ocho áreas de acción prioritaria. Las dos áreas en las que menos pasos se han dado y se requieren acciones rápidas son la atención a los inmigrantes, con todos los temas conexos, y la inversión en investigación a partir de planes estratégicos sólidos. Aunque persisten brechas amplias, se han logrado avances significativos en las acciones dirigidas a los grupos más vulnerables y difíciles de alcanzar, el cribado de la TB activa y latente, el diagnóstico y tratamiento de TB resistente, en los sistemas de vigilancia e información y en los programas de monitoreo y evaluación. En un punto intermedio de avance, pero con una necesidad urgente de mejoramiento por su impacto general en todas las áreas de acción prioritaria, se encuentran el aseguramiento de compromiso político, recursos financieros y gerencia de la planeación y oferta de servicios de calidad y el apoyo nacional y local a los planes globales enfocados en la eliminación de la TB.

Las [tablas 2 y 3](#) muestran los principales indicadores de impacto y de seguimiento a la implementación de acciones para la eliminación que fueron definidos en la reunión anotando, como se mencionó, que las metas y los indicadores para cada una de las ocho acciones prioritarias se deben ajustar a nivel regional y de los países (6, 82, 111).

**Tabla 2. Principales indicadores de impacto**

| Indicador                                                 | Hitos |      | Metas             |                   |
|-----------------------------------------------------------|-------|------|-------------------|-------------------|
|                                                           | 2020  | 2025 | 2030 <sup>1</sup> | 2035 <sup>2</sup> |
| Reducción de la mortalidad por TB comparada con 2015      | 35%   | 75%  | 90%               | 95%               |
| Reducción de la incidencia de TB comparada con 2015       | 20%   | 50%  | 80%               | 90%               |
| Proporción de familias afectadas por costos catastróficos | 0%    | 0%   | 0%                | 0%                |

<sup>1</sup> Metas de Desarrollo Sostenible (111)

<sup>2</sup> Metas de la Estrategia Mundial Fin de la Tuberculosis (6, 82)

**Tabla 3. Principales indicadores de seguimiento**

| INDICADOR                                                                                                               | Meta 2025 |
|-------------------------------------------------------------------------------------------------------------------------|-----------|
| 1. Cobertura de tratamiento para TB                                                                                     | ≥ 90%     |
| 2. Porcentaje de éxito del tratamiento para TB                                                                          | ≥ 90%     |
| 3. Porcentaje de familias que se enfrentan a costos catastróficos debido a la TB                                        | 0%        |
| 4. Porcentaje de pacientes nuevos de TB que fueron diagnosticados mediante las pruebas rápidas recomendadas por OMS     | ≥90%      |
| 5. Cobertura de tratamiento para infección latente por TB                                                               | ≥90%      |
| 6. Cobertura en investigación de contactos                                                                              | ≥90%      |
| 7. Cobertura de pacientes de TB con resultados de PSF                                                                   | 100%      |
| 8. Cobertura de tratamiento con nuevos medicamentos                                                                     | ≥90%      |
| 9. Porcentaje de pacientes de TB con estado de VIH conocido                                                             | ≥90%      |
| 10. Letalidad por TB                                                                                                    | ≤5%       |
| 11. Porcentaje de cumplimiento del presupuesto anual necesario para el desarrollo de los planes de Eliminación de la TB | 100%      |
| 12. Porcentaje de cumplimiento de las acciones de monitoreo y evaluación                                                | 100%      |

## 7. Roles y responsabilidades

La heterogeneidad de los sistemas de salud, de los gobiernos y de la organización social en la Región determina la necesidad de que cada país defina con precisión las competencias y las responsabilidades de cada uno de los actores involucrados en la implementación de la Hoja de Ruta para la Eliminación de la TB y de la estrategia Fin de la TB (82).

Un aspecto cada vez más relevante es que la solución a la problemática en TB va más allá del sector de la salud y su recurso humano y se hace necesario definir las competencias y las responsabilidades de otros sectores, como el sector educativo, del gobierno en general y de la comunidad (6, 25, 34, 82, 112-115). El programa nacional de TB será responsable de la recolección y análisis de la información del país y del monitoreo y evaluación del plan estratégico nacional y sus acciones. Es recomendable la supervisión y la participación periódicas del Comité Técnico Asesor de TB de la OPS, del Grupo de Trabajo de Laboratorios, del Comité Luz Verde Regional y de los puntos focales de TB de OPS/OMS en los países de la región.

Los países de incidencia baja y aquéllos de incidencia intermedia que tienen poblaciones o áreas geográficas de incidencia baja, deben establecer planes estratégicos nacionales de TB actualizados que den prioridad a las acciones de eliminación (4, 7, 24, 82).

Con el concepto de la TB como problema de salud pública que involucra otros sectores y la comunidad, los Programas Nacionales de Tuberculosis y los planes estratégicos deben tener carácter gubernamental, con integración completa de todos los actores y las redes de prestación de servicios de los sistemas de salud.

## **8. Papel de la comunidad académica**

Una dificultad notoria en la implementación y ejecución de los planes estratégicos es que el personal de salud que realiza directamente las acciones inherentes a los planes es frecuentemente transitorio y de poca experiencia en TB. Esta situación resalta la importancia de la enseñanza y la formación en TB en las facultades de ciencias de la salud, las cuales suelen ser insuficientes especialmente en los aspectos relacionados con las políticas de salud pública, las guías nacionales e internacionales en TB y el funcionamiento de los programas nacionales (116-118).

Adicionalmente, en varios de los países de Latinoamérica y el Caribe no hay un suficiente acercamiento de las universidades, las asociaciones científicas y la práctica privada en relación con las políticas públicas en Tuberculosis. El seguimiento de las guías nacionales por parte de los médicos especialistas, como sucede también fuera de la Región (119), no es óptimo. Es necesario involucrar a las asociaciones científicas y a los médicos especialistas en las actividades de los programas nacionales de tuberculosis, no sólo en el componente asistencial, sino en los aspectos de educación, entrenamiento e investigación (120, 121). La alianza entre la Asociación Latinoamericana de Tórax (ALAT), la Sociedad Europea de enfermedades Respiratorias y la Organización Panamericana de la Salud para el desarrollo de la Hoja de Ruta para la Eliminación de la Tuberculosis en Latinoamérica y el Caribe es una expresión de la fortaleza del trabajo colaborativo.

## BIBLIOGRAFÍA

1. Naciones Unidas. Declaración del milenio. Asamblea General, Quincuagésimo quinto período de sesiones de la Asamblea General de las Naciones Unidas. Septiembre de 2000 a Septiembre de 2001. <http://www.un.org/spanish/milenio/ares552.pdf> (consultado enero 29, 2016).
2. World Health Organization. Global tuberculosis report 2016. WHO/HTM/TB/2016.13. Geneva, World Health Organization, 2016. [Consultado el 16 de octubre de 2016]. Disponible en: [http://www.who.int/tb/publications/global\\_report/en/](http://www.who.int/tb/publications/global_report/en/).
3. Organización Panamericana de la Salud/Organización Mundial de la Salud, Enfermedades Transmisibles y Análisis de Salud/Información y Análisis de Salud: Situación de Salud en las Américas: Indicadores Básicos 2016. Washington, D.C., 2016. OPS/CHA/HA/16.01. Disponible en: <http://iris.paho.org/xmlui/handle/123456789/31288> [consultado en enero 23 octubre 7 de 2017]
4. Organización Panamericana de la Salud. Plan de acción para la prevención y el control de la tuberculosis en las Américas, 2016-2019. 54<sup>o</sup> Consejo Directivo y 67<sup>a</sup> Sesión del Comité Regional de la OMS para Las Américas. Octubre, 2015. [www.paho.org/tuberculosis](http://www.paho.org/tuberculosis) (consultado el 30 de noviembre de 2015).
5. Organización Panamericana de la Salud. Tuberculosis in the Americas. Regional Report 2014. Epidemiology, Control, and Financing. Washington, OPS, 2015. [www.paho.org/tuberculosis](http://www.paho.org/tuberculosis) (consultado el 19 de septiembre de 2015).
6. World Health Organization. The End TB Strategy. Global strategy and targets for tuberculosis prevention, care and control after 2015. [http://www.who.int/tb/post2015\\_strategy/en/](http://www.who.int/tb/post2015_strategy/en/) (consultado el 10 de septiembre de 2015).
7. Lonnroth K, Migliori GB, Abubakar I, D'Ambrosio L, de Vries G, Diel R, et al. Towards tuberculosis elimination: an action framework for low-incidence countries. *Eur Respir J*. 2015;45:928-52.
8. Diel R, Loddenkemper R, Zellweger JP, Sotgiu G, D'Ambrosio L, Centis R, et al. Old ideas to innovate tuberculosis control: preventive treatment to achieve elimination. *Eur Respir J*. 2013;42:785-801.
9. Organización Panamericana de la Salud. Plan estratégico de la OPS 2014 – 2019. Washington, OPS, 2014. [www.paho.org/tuberculosis](http://www.paho.org/tuberculosis) (Consultado el 12 de febrero de 2016).
10. D'Ambrosio L, Dara M, Tadolini M, Centis R, Sotgiu G, van der Werf MJ, et al. Tuberculosis elimination: theory and practice in Europe. *Eur Respir J*. 2014;43:1410-20.
11. Rendon A, Fuentes Z, Torres-Duque CA, Granado MD, Victoria J, Duarte R, et al. Roadmap for tuberculosis elimination in Latin American and Caribbean countries: a strategic alliance. *Eur Respir J*. 2016;48:1282-7.
12. Clancy L, Rieder HL, Enarson DA, Spinaci S. Tuberculosis elimination in the countries of Europe and other industrialized countries. *Eur Respir J*. 1991;4:1288-95.
13. Veen J, Migliori GB, Raviglione M, Rieder HL, Dara M, Falzon D, et al. Harmonisation of TB control in the WHO European region: the history of the Wolfheze Workshops. *Eur Respir J*. 2011;37:950-9.
14. World Health Organization. Global tuberculosis report 2013. World Health Organization, Geneva, 2013. WHO/HTM/TB/2013.11. [Consultado el 30 de abril de 2017]. Disponible en: [http://www.who.int/tb/publications/global\\_report/en/](http://www.who.int/tb/publications/global_report/en/).
15. Herrera T. VI Reunión de países de baja prevalencia de tuberculosis en las Américas. *Rev Chil Enferm Respir*. 2013;29:108-12.

16. Organización Panamericana de la Salud. VII Reunión Regional de países de baja incidencia de tuberculosis de las Américas. Bogotá, abril de 2015. Disponible en: [www.paho.org](http://www.paho.org).
17. Marrero A, Caminero JA, Rodriguez R, Billo NE. Towards elimination of tuberculosis in a low income country: the experience of Cuba, 1962-97. *Thorax*. 2000;55:39-45.
18. Organización Panamericana de la Salud. Tuberculosis multidrogorresistente (TB-MDR) en las Américas, 2016. Evaluación de cohortes a 2012. Disponible en: [http://www.paho.org/hq/index.php?option=com\\_topics&view=article&id=59&Itemid=40776&lang=en](http://www.paho.org/hq/index.php?option=com_topics&view=article&id=59&Itemid=40776&lang=en) [Consultado el 12 de agosto de 2016].
19. Munayco CV, Mújica OJ, León FX, Granado Md, Espinal MA. Social determinants and inequalities in tuberculosis incidence in Latin America and the Caribbean. *Rev Panam Salud Pub* 2015;38:177-85.
20. Organización Panamericana de la Salud. Plan regional de Tuberculosis 2006 - 2015. OPS, 2005.  
[http://www.paho.org/hq/index.php?option=com\\_docman&task=doc\\_view&gid=24131&Itemid=270](http://www.paho.org/hq/index.php?option=com_docman&task=doc_view&gid=24131&Itemid=270). (consultado: junio 30, 2016).
21. World Health Organization. The Stop TB Strategy. Geneva, 2006. WHO/HTM/TB/2006.368. Disponible en: [http://apps.who.int/iris/bitstream/10665/69241/1/WHO\\_HTM\\_STB\\_2006.368\\_eng.pdf](http://apps.who.int/iris/bitstream/10665/69241/1/WHO_HTM_STB_2006.368_eng.pdf) [Consultado el 31 de marzo de 2016]
22. World Health Organization. Health Systems financing: the path to universal coverage. Plan of Action. Geneva, World Health Organization 2012. Disponible en: [http://www.who.int/health\\_financing/Health\\_Systems\\_Financing\\_Plan\\_Action.pdf](http://www.who.int/health_financing/Health_Systems_Financing_Plan_Action.pdf) [consultado el 30 de abril de 2016].
23. Warren AE, Wyss K, Shakarishvili G, Atun R, de Savigny D. Global health initiative investments and health systems strengthening: a content analysis of global fund investments. *Global Health*. 2013;9:30.
24. World Health Organization. Toolkit to develop a national strategic plan for TB prevention, care and control Methodology on how to develop a national strategic plan. Geneva, 2015. Disponible en: [http://apps.who.int/iris/bitstream/10665/153811/1/9789241507974\\_eng.pdf](http://apps.who.int/iris/bitstream/10665/153811/1/9789241507974_eng.pdf). [Consultado el 10 de marzo de 2016].
25. World Health Organization. Everybody's business: strengthening health systems to improve health outcomes: WHO's framework for action. Geneva, 2007. Disponible en: [www.who.int/healthsystems/strategy/everybodys\\_business.pdf](http://www.who.int/healthsystems/strategy/everybodys_business.pdf).
26. Atun R, Weil DE, Eang MT, Mwakyusa D. Health-system strengthening and tuberculosis control. *Lancet*. 2010;375:2169-78.
27. Lonnroth K, Castro KG, Chakaya JM, Chauhan LS, Floyd K, Glaziou P, et al. Tuberculosis control and elimination 2010-50: cure, care, and social development. *Lancet*. 2010;375:1814-29.
28. Ali M. Treating tuberculosis as a social disease. *Lancet*. 2014;383:2195.
29. Siroka A, Lönnroth K, Ponce N. The impact of social protection on tuberculosis rates: a global analysis. *Lancet Infect Dis* 2016;16:473-9.
30. Reeves A, Basu S, McKee M, Stuckler D, Sandgren A, Semenza J. Social protection and tuberculosis control in 21 European countries, 1995-2012: a cross-national statistical modelling analysis. *Lancet Infect Dis*. 2014;14:1105-12.
31. Cecchini S, Filgueira F, Robles C. Sistemas de protección social en América Latina y el Caribe. Una perspectiva comparada Comisión Económica para América Latina y el Caribe (CEPAL). Naciones Unidas, Santiago de Chile, 2014. Disponible en: [http://repositorio.cepal.org/bitstream/handle/11362/36831/1/S2014250\\_es.pdf](http://repositorio.cepal.org/bitstream/handle/11362/36831/1/S2014250_es.pdf).

32. Doherty AM, Kelly J, McDonald C, O'Dwyer AM, Keane J, Cooney J. A review of the interplay between tuberculosis and mental health. *Gen Hosp Psychiatry*. 2013;35:398-406.
33. De Araújo GS, Pereira SM, dos Santos DN, Marinho JM, Rodrigues LC, Barreto ML. Common mental disorders associated with tuberculosis: A matched case-control study. *PLoS ONE* 2014;9:e99551.
34. World Health Organization. Community Involvement in Tuberculosis Care and Prevention: Towards Partnerships for Health: Guiding Principles and Recommendations Based on a WHO Review. Geneva, 2008. Available from: <https://www.ncbi.nlm.nih.gov/books/NBK143698/>. 2008.
35. Zenner D, Southern J, van Hest R, DeVries G, Stagg HR, Antoine D, et al. Active case finding for tuberculosis among high-risk groups in low-incidence countries. *Int J Tuberc Lung Dis*. 2013;17:573-82.
36. Pan American Health Organization. Framework for tuberculosis control in large cities of Latin America and the Caribbean. Washington, 2016. Disponible en: <file:///C:/Users/Administrador/Downloads/2016-cha-tb-framework-big-cities.pdf>.
37. Dooley KE, Chaisson RE. Tuberculosis and diabetes mellitus: convergence of two epidemics. *Lancet Infect Dis*. 2009;9:737-46.
38. Badawi A, Sayegh S, Sallam M, Sadoun E, Al-Thani M, Alam MW, et al. The global relationship between the prevalence of diabetes mellitus and incidence of tuberculosis: 2000-2012. *Glob J Health Sci*. 2014;7:183-91.
39. Slama K, Chiang CY, Enarson DA, Hassmiller K, Fanning A, Gupta P, et al. Tobacco and tuberculosis: a qualitative systematic review and meta-analysis. *Int J Tuberc Lung Dis*. 2007;11:1049-61.
40. Lönnroth K, Williams BG, Stadlin S, Jaramillo E, Dye C. Alcohol use as a risk factor for tuberculosis – a systematic review. *BMC Public Health*. 2008;8:289.
41. European Centre for Disease Prevention and Control. Guidance on tuberculosis control in vulnerable and hard-to-reach populations. Stockholm, March 2016. Disponible en: <http://ecdc.europa.eu/en/publications/publications/tb-guidance-interventions-vulnerable-groups.pdf> [Consultado el 15 de junio de 2016]. 2016.
42. Caylà JA, Rodrigo T, Ruiz-Manzano J, Caminero JA, Vidal R, García JM, et al. Tuberculosis treatment adherence and fatality in Spain. *Respir Research*. 2009;10:1.
43. García-García JM, Blanquer R, Rodrigo T, Cayla JA, Caminero JA, Vidal R, et al. Social, clinical and microbiological differential characteristics of tuberculosis among immigrants in Spain. *PloS one*. 2011;6:e16272.
44. World Health Organization. A guide to monitoring and evaluation for collaborative TB/HIV activities. 2015 Revision. WHO/HTM/TB/2015.02. Geneva, 2015. Disponible en: [http://www.who.int/tb/publications/m\\_and\\_e\\_document\\_page/en/](http://www.who.int/tb/publications/m_and_e_document_page/en/). [Consultado el 30 de junio de 2016].
45. Pareek M, Greenaway C, Noori T, Munoz J, Zenner D. The impact of migration on tuberculosis epidemiology and control in high-income countries: a review. *BMC Med*. 2016;14:48.
46. Molina-Salas Y, de las Mercedes Lomas-Campos M, Romera-Guirado FJ, Romera-Guirado MJ. Influence of migration on tuberculosis in a semi-urban area. *Arch Bronconeumol*. 2014;50:325-31.
47. Organización Mundial de la Salud, Migración Internacional, Salud y Derechos Humanos. Disponible en: [http://www.who.int/hhr/activities/2005%20PRT%2016325%20ADD%201%20Migr\\_HR-Spanish%20edition.pdf](http://www.who.int/hhr/activities/2005%20PRT%2016325%20ADD%201%20Migr_HR-Spanish%20edition.pdf) [Consultado el 30 de septiembre de 2016]. 2003.
48. Cordoba R. Rutas y dinámicas migratorias entre los países de América Latina y el Caribe (ALC), y entre ALC y la Unión Europea. Organización Internacional para las Migraciones



- (OIM), Bruselas, 2012. Disponible en: [http://publications.iom.int/system/files/pdf/rutas\\_migratorias\\_final.pdf](http://publications.iom.int/system/files/pdf/rutas_migratorias_final.pdf).
49. Blewett LA, Marmor S, Pintor JK, Boudreaux M. Aligning US health and immigration policy to reduce the incidence of tuberculosis. *Int J Tuberc Lung Dis*. 2014;18:397-404.
  50. Zimmerman C, Kiss L, Hossain M. Migration and health: a framework for 21st century policy-making. *PLoS Med*. 2011;8:e1001034.
  51. World Health Organization. Tuberculosis prevention and care for migrants. Disponible en: [http://www.who.int/tb/publications/WHOIOM\\_TBmigration.pdf](http://www.who.int/tb/publications/WHOIOM_TBmigration.pdf). [Consultado el 30 de junio de 2016].
  52. International Organization for Migration. Migration and Tuberculosis : A Pressing Issue. <https://www.iom.int/files/live/sites/iom/files/What-We-Do/docs/Migration-Tuberculosis-A-Pressing-Issue.pdf> 2012.
  53. Arshad S, Bavan L, Gajari K, Paget SN, Baussano I. Active screening at entry for tuberculosis among new immigrants: a systematic review and meta-analysis. *Eur Respir J*. 2010;35:1336-45.
  54. Aldridge RW, Yates TA, Zenner D, White PJ, Abubakar I, Hayward AC. Pre-entry screening programmes for tuberculosis in migrants to low-incidence countries: a systematic review and meta-analysis. *Lancet Infect Dis*. 2014;14:1240-9.
  55. Dara M, Solovic I, Sotgiu G, D'Ambrosio L, Centis R, Tran R, et al. Tuberculosis care among refugees arriving in Europe: a ERS/WHO Europe Region survey of current practices. *Eur Respir J*. 2016;48:808-17.
  56. Campbell JR, Krot J, Elwood K, Cook V, Marra F. A systematic review on TST and IGRA tests used for diagnosis of LTBI in immigrants. *Mol Diagn Ther*. 2015;19:9-24.
  57. Dara M, De Colombani P, Petrova-Benedict R, Centis R, Zellweger J-P, Sandgren A, et al. Minimum package for cross-border TB control and care in the WHO European region: a Wolfheze consensus statement. *European Respiratory Journal*. 2012;40:1081-90.
  58. Broekmans J, Migliori G, Rieder H, Lees J, Ruutu P, Loddenkemper R, et al. European framework for tuberculosis control and elimination in countries with a low incidence. *European Respiratory Journal*. 2002;19:765-75.
  59. Reichler MR, Reves R, Bur S, Thompson V, Mangura BT, Ford J, et al. Evaluation of investigations conducted to detect and prevent transmission of tuberculosis. *Jama*. 2002;287:991-5.
  60. World Health Organization. Early detection of tuberculosis: an overview of approaches, guidelines and tools. Geneva: World Health Organization, 2011. Disponible en: <http://apps.who.int/iris/handle/10665/70824> [Consultado el 31 de julio de 2016]. 2011.
  61. Horsburgh Jr CR, Rubin EJ. Latent tuberculosis infection in the United States. *New England Journal of Medicine*. 2011;364:1441-8.
  62. World Health Organization. Guidelines on the Management of Latent Tuberculosis Infection. Geneva: World Health Organization; 2015. Disponible en: <https://www.ncbi.nlm.nih.gov/books/NBK293818/> [Consultada el 10 de abril de 2016].
  63. World Health Organization. Guidance for National Tuberculosis Programmes on the Management of Tuberculosis in Children. 2nd edition. Geneva: World Health Organization; 2014. 3, Diagnosis of TB in children. Disponible en: <https://www.ncbi.nlm.nih.gov/books/NBK214442/> [Consultada el 10 de abril de 2016].
  64. Akolo C, Adetifa I, Shepperd S, Volmink J. Treatment of latent tuberculosis infection in HIV infected persons. *Cochrane Database Syst Rev*. 2010;1.
  65. World Health Organization. Guidelines for intensified tuberculosis case-finding and isoniazid preventive therapy for people living with HIV in resource constrained settings. Geneva: World Health Organization, 2011. Disponible en:



- [http://apps.who.int/iris/bitstream/10665/44472/1/9789241500708\\_eng.pdf](http://apps.who.int/iris/bitstream/10665/44472/1/9789241500708_eng.pdf) [Consultada en 15 de junio de 2016].
66. Baussano I, Williams BG, Nunn P, Beggiato M, Fedeli U, Scano F. Tuberculosis incidence in prisons: a systematic review. *PLoS Med.* 2010;7:e1000381.
67. Centers for Disease Control and Prevention. Division of Tuberculosis Elimination. Tuberculosis Outbreak. Detection and Response. CDC, Atlanta, EEUU, 2014. Disponible en: [www.cdc.gov/tb/education/ssmodules/pdfs/module9.pdf](http://www.cdc.gov/tb/education/ssmodules/pdfs/module9.pdf) [consultado el 10 de febrero de 2017].
68. World Health Organization. WHO policy on TB infection control in health-care facilities, congregate settings and households: Geneva: World Health Organization, 2009. Disponible en: Available from: <https://www.ncbi.nlm.nih.gov/books/NBK179249/> [Consultado el 30 de septiembre de 2016]. Geneva: World Health Organization 2009.
69. Maher D, Grzemska M, Coninx R, Reyes H. Guidelines for the control of tuberculosis in prisons. Geneva, World Health Organization, 1998. WHO/TB/98.250. Disponible en: [http://apps.who.int/iris/bitstream/10665/64622/1/WHO\\_TB\\_98.250.pdf](http://apps.who.int/iris/bitstream/10665/64622/1/WHO_TB_98.250.pdf) [Consultado el 30 de septiembre de 2016]. 1998.
70. Paiao DS, Lemos EF, Carbone AD, Sgarbi RV, Junior AL, da Silva FM, et al. Impact of mass-screening on tuberculosis incidence in a prospective cohort of Brazilian prisoners. *BMC Infect Dis.* 2016;16:533.
71. World Health Organization. Systematic Screening for Active Tuberculosis: Principles and Recommendations. Geneva: World Health Organization; 2013. WHO/HTM/TB/2013.04. Disponible en: <https://www.ncbi.nlm.nih.gov/books/NBK294083/> [Consultado el 25 de mayo de 2017].
72. World Health Organization. Systematic screening for active tuberculosis: principles and recommendations. Geneva: World Health Organization; 2013. Disponible en: <https://www.ncbi.nlm.nih.gov/books/NBK294091/> [Consultado el 30 de septiembre de 2016]. 2013.
73. Mir Viladrich I, Dauden Tello E, Solano-Lopez G, Lopez Longo FJ, Taxonera Samsó C, Sanchez Martinez P, et al. Consensus Document on Prevention and Treatment of Tuberculosis in Patients for Biological Treatment. *Arch Bronconeumol.* 2016;52:36-45.
74. Wright C, Westerkamp L, Korver S, Dobler C. Community-based directly observed therapy (DOT) versus clinic DOT for tuberculosis: a systematic review and meta-analysis of comparative effectiveness. *BMC Infectious Diseases.* 2015;15:210.
75. Zhang H, Ehiri J, Yang H, Tang S, Li Y. Impact of Community-Based DOT on Tuberculosis Treatment Outcomes: A Systematic Review and Meta-Analysis. *PLoS One.* 2016;11:e0147744.
76. The Global Fund. Monitoring and Evaluation toolkit: HIV. Tuberculosis, Malaria and Health and Community Systems Strengthening. Disponible en: [http://www.aidsdatahub.org/sites/default/files/documents/Global\\_Fund\\_M\\_E\\_Toolkit.pdf](http://www.aidsdatahub.org/sites/default/files/documents/Global_Fund_M_E_Toolkit.pdf) [Consultado el 30 de septiembre de 2016]. 2009.
77. Golub JE, Chaisson RE, Martinson NA. Additive effects of isoniazid preventive therapy and HAART. *AIDS (London, England).* 2009;23:1446.
78. World Health Organization. WHO treatment Guidelines for drug-resistant tuberculosis. 2016 Update. Geneva, 2016. WHO/HTM/TB/2016.04. Disponible en: <http://www.who.int/tb/MDRTBguidelines2016.pdf> [Consultado el 15 de junio de 2016]. 2016.
79. Falzon D, Schünemann HJ, Harausz E, González-Angulo L, Lienhardt C, Jaramillo E, et al. WHO treatment guidelines for drug-resistant tuberculosis, 2016 update. *Eur Respir J.* 2017;Mar 22;49(3).

80. Rendon A, Centis R, D'Ambrosio L, Migliori GB. WHO strategies for the management of drug-resistant tuberculosis. *Arch Bronconeumol*. 2017;53:95-7.
81. Caminero JA. Multidrug-resistant tuberculosis: epidemiology, risk factors and case finding. *Int J Tuberc Lung Dis*. 2010;14:382-90.
82. World Health Organization. Implementing the end TB strategy: the essentials. Geneva, 2015. WHO/HTM/TB/2015.31. Disponible en: [http://www.who.int/tb/publications/2015/The\\_Essentials\\_to\\_End\\_TB/en/](http://www.who.int/tb/publications/2015/The_Essentials_to_End_TB/en/) [Consultado el 10 de abril de 2016].
83. Falzon D, Jaramillo E, Schunemann HJ, Arentz M, Bauer M, Bayona J, et al. WHO guidelines for the programmatic management of drug-resistant tuberculosis: 2011 update. *Eur Respir J*. 2011;38:516-28.
84. Hopewell PC, Fair EL, Uplekar M. Updating the International Standards for Tuberculosis Care. Entering the era of molecular diagnostics. *Annals of the American Thoracic Society*. 2014;11:277-85.
85. World Health Organization. Xpert MTB/RIF implementation manual Technical and operational 'how-to': practical considerations. Geneva, 2014. WHO/HTM/TB/2014.1. Disponible en: [http://apps.who.int/iris/bitstream/10665/112469/1/9789241506700\\_eng.pdf](http://apps.who.int/iris/bitstream/10665/112469/1/9789241506700_eng.pdf) [Consultado el 10 de julio de 2016].
86. Calligaro GL, Zijenah LS, Peter JG, Theron G, Buser V, McNerney R, et al. Effect of new tuberculosis diagnostic technologies on community-based intensified case finding: a multicentre randomised controlled trial. *Lancet Infect Dis*. 2017;17:441-50.
87. Caminero JA, Cayla JA, Garcia-Garcia JM, Garcia-Perez FJ, Palacios JJ, Ruiz-Manzano J. Diagnosis and Treatment of Drug-Resistant Tuberculosis. *Arch Bronconeumol*. 2017;10.1016/j.arbres.2017.02.006.
88. Vassall A, van Kampen S, Sohn H, Michael JS, John KR, den Boon S, et al. Rapid diagnosis of tuberculosis with the Xpert MTB/RIF assay in high burden countries: a cost-effectiveness analysis. *PLoS Med*. 2011;8:e1001120.
89. Shah L, Rojas M, Mori O, Zamudio C, Kaufman JS, Otero L, et al. Cost-effectiveness of active case-finding of household contacts of pulmonary tuberculosis patients in a low HIV, tuberculosis-endemic urban area of Lima, Peru. *Epidemiol Infect*. 2017;145:1107-17.
90. World Health Organization. The use of molecular line probe assays for the detection of resistance to second-line anti-tuberculosis drugs. Geneva, 2016. WHO/HTM/TB/2016.07. Disponible en: <http://www.who.int/tb/WHOPolicyStatementSLLPA.pdf>. [Consultado el 30 de noviembre de 2016].
91. Migliori GB, Zellweger J-P, Abubakar I, Ibraim E, Caminero JA, De Vries G, et al. European union standards for tuberculosis care. *European Respiratory Journal*. 2012;39:807-19.
92. Caminero JA. Guidelines for Clinical and Operational Management of Drug-Resistant Tuberculosis. Paris, France, 2013. The Union (International Union Against Tuberculosis and Lung Disease). Disponible en: [http://www.theunion.org/what-we-do/publications/technical/english/mdr-tbguide\\_6-19-13\\_web.pdf](http://www.theunion.org/what-we-do/publications/technical/english/mdr-tbguide_6-19-13_web.pdf) [Consultado el 10 de abril de 2016].
93. World Health Organization. Policy Implementation package for new TB Drug introduction. Geneva, 2014. WHO/HTM/TB/2012.22. Disponible en: <http://www.who.int/tb/PIPnewTBdrugs.pdf>. [Consultado el 25 de junio de 2016].
94. Dalcolmo M, Gayoso R, Sotgiu G, D'Ambrosio L, Rocha JL, Borga L, et al. Resistance profile to the drugs composing the 'shorter' regimen for multidrug-resistant TB in Brazil, 2000-2015. *Eur Respir J*. 2017; In press.

95. Laniado-Laborín R, Kiy R, Spanevello A, D'Ambrosio L, Centis R, Migliori G. Declaration on palliative care for MDR/XDR-TB [Correspondence]. *The International Journal of Tuberculosis and Lung Disease*. 2012;16:1418-9.
96. Zignol M, van Gemert W, Falzon D, Jaramillo E, Blanc L, Raviglione M. Modernizing surveillance of antituberculosis drug resistance: from special surveys to routine testing. *Clin Infect Dis*. 2011;52:901-6.
97. Zignol M, Dean AS, Falzon D, van Gemert W, Wright A, van Deun A, et al. Twenty Years of Global Surveillance of Antituberculosis-Drug Resistance. *N Engl J Med*. 2016;375:1081-9.
98. D'Ambrosio L, Tadolini M, Centis R, Duarte R, Sotgiu G, Aliberti S, et al. Supporting clinical management of the difficult-to-treat TB cases: the ERS-WHO TB Consilium. *Int J Infect Dis*. 2015;32:156-60.
99. World Health Organization. Standards and benchmarks for tuberculosis surveillance and vital registration systems: checklist and user guide. Geneva, 2014. WHO/HTM/TB/2014.2 and WHO/HTM/TB/2014.6 (Checklist). Disponible en: <http://www.who.int/tb/publications/standardsandbenchmarks/en/> [Consultado el 15 de junio de 2016].
100. World Health Organization. Compendium of Indicators for Monitoring and Evaluating National Tuberculosis Programs. Geneva, 2004. WHO/HTM/TB/2004.344. Disponible en: <file:///C:/Users/Administrador/Downloads/ms-04-11.pdf>. [Consultado el 1 de mayo de 2016].
101. European Centre for Disease Prevention and Control/WHO Regional Office for Europe. Tuberculosis surveillance and monitoring in Europe 2013. Stockholm, 2013. Disponible en: <http://ecdc.europa.eu/en/publications/Publications/Tuberculosis-surveillance-monitoring-2013.pdf> [Consultado el 10 de abril de 2016].
102. Haas W. High time to tackle childhood tuberculosis. *Euro Surveill*. 2011;16.
103. Timimi H, Falzon D, Glaziou P, Sismanidis C, Floyd K. WHO guidance on electronic systems to manage data for tuberculosis care and control. *Journal of the American Medical Informatics Association : JAMIA*. 2012;19:939-41.
104. Mitchell, E., Cloutier, S., Moodie, C. Ochola, R., Persaud, N., Bloss, E. Huitema, I. Innovations in TB Data Quality: An M&E Workshop Facilitators guide, 2014. TB Care I. Disponible en: [http://www.challengetb.org/publications/tools/me/Data Quality Faciliators Manual M E Course.pdf](http://www.challengetb.org/publications/tools/me/Data%20Quality%20Facilitators%20Manual%20M%20E%20Course.pdf). [Consultado el 15 de junio de 2016].
105. Moonan PK, Ghosh S, Oeltmann JE, Kammerer JS, Cowan LS, Navin TR. Using genotyping and geospatial scanning to estimate recent mycobacterium tuberculosis transmission, United States. *Emerg Infect Dis*. 2012;18:458-65.
106. Jia ZW, Jia XW, Liu YX, Dye C, Chen F, Chen CS, et al. Spatial analysis of tuberculosis cases in migrants and permanent residents, Beijing, 2000-2006. *Emerg Infect Dis*. 2008;14:1413-9.
107. World Health Organization / TDR For research on diseases of poverty UNICEF/UNDP/World Bank/WHO. Priorities for tuberculosis research. Disponible en: [http://www.who.int/tdr/publications/tuberculosis\\_research/en/](http://www.who.int/tdr/publications/tuberculosis_research/en/). [Consultado el 30 de septiembre de 2016].
108. Nicolau I, Ling D, Tian L, Lienhardt C, Pai M. Research questions and priorities for tuberculosis: a survey of published systematic reviews and meta-analyses. *PLoS One*. 2012;7:e42479.
109. World Health Organization. A global action framework for TB research in support of the third pillar of WHO's END TB strategy. 2015. Disponible en: <http://www.who.int/tb/publications/global-framework-research/en/> [Consultado el 4 de abril de 2016].

110. World Health Organization. Quality of care. A process for making strategic choices in health systems. Geneva, 2008. Disponible en: [http://www.who.int/management/quality/assurance/QualityCare\\_B.Def.pdf?ua=1](http://www.who.int/management/quality/assurance/QualityCare_B.Def.pdf?ua=1) [Consultado el 30 de abril de 2016].
111. United Nations. Sustainable Development Goals, 2015 - 2030. Disponible en: <http://www.un.org/sustainabledevelopment/health/> [Consultado el 30 de junio de 2016].
112. Center for Disease Control and Prevention. Tuberculosis. Tools for Health Care Providers. Disponible en: [https://www.cdc.gov/tb/education/provider\\_edmaterials.htm](https://www.cdc.gov/tb/education/provider_edmaterials.htm) [Consultado el 28 de diciembre de 2016].
113. World Health Organization. The HRH action framework and HRD for implementation of the Stop TB Strategy. Geneva, 2005. Disponible en: [http://www.who.int/tb/health\\_systems/human\\_resources/hrh\\_action\\_framework/en/index2.html](http://www.who.int/tb/health_systems/human_resources/hrh_action_framework/en/index2.html). [Consultado el 30 de noviembre de 2016].
114. World Health Organization. Training for better TB control: human resource development for TB control A strategic approach within country support. Geneva, 2002. WHO/CDS/TB/2002.301. Disponible en: <http://www.who.int/tb/publications/training-resources-tbcontrol/en/>. [Consultado el 30 de noviembre de 2016].
115. Arnadottir T. Tuberculosis and Public Health. Policies and principles in tuberculosis control. The Union ( International Union Against Tuberculosis and Lung Diseases). Paris, 2009. Disponible en: [http://www.theunion.org/what-we-do/publications/technical/english/pub\\_tbpublish-public-health\\_eng.pdf](http://www.theunion.org/what-we-do/publications/technical/english/pub_tbpublish-public-health_eng.pdf). [Consultado el 30 de noviembre de 2016].
116. Wilches-Luna EC, Hernández NL, Hernández OM, Pérez-Vélez CM. Conocimientos, actitudes, prácticas y educación sobre tuberculosis en estudiantes de una facultad de salud. *Revista de Salud Pública*. 2016;18:129-41.
117. Organización Panamericana de la Salud. Enseñanza de la tuberculosis en las facultades de salud. Washington, 2005. Disponible en: [http://pdf.usaid.gov/pdf\\_docs/PNADG116.pdf](http://pdf.usaid.gov/pdf_docs/PNADG116.pdf) [Consultado el 30 de noviembre de 2016].
118. Zhao Y, Ehiri J, Li D, Luo X, Li Y. A survey of TB knowledge among medical students in Southwest China: is the information reaching the target? *BMJ Open*. 2013;3.
119. Garcia-Garcia JM, Rodrigo T, Casals M, Ruiz-Manzano J, Pascual-Pascual T, Cayla JA. Spanish Compliance With Guidelines for Prescribing Four Drugs in the Intensive Phase of Standard Tuberculosis Treatment. *Arch Bronconeumol*. 2016;52:262-8.
120. Caminero JA, Billo N. Involving private practitioners and chest physicians in the control of tuberculosis. *Tuberculosis (Edinb)*. 2003;83:148-55.
121. Bastos MLSd, Trajman A, Teixeira EG, Selig L, Belo MTCT. O papel das ligas acadêmicas na formação profissional. *Jornal Brasileiro de Pneumologia*. 2012;38:803-5.
